# Supplementary material for: Synthesis and modification of novel thiazole-fused quinoxalines as new insecticidal agents against the cotton leafworm Spodoptera litura: design, characterization, in vivo bio-evaluation, toxicological effectiveness, and study their mode of action
Source: Royal Society of Chemistry journal article supplement (doi:10.1039/d4ra08096c), 2025-01-01

**Synthesis, modification of new thiazole nucleus fused quinoxalines and their insecticidal activity targeting the cotton leafworm, *Spodoptera litura*; Design, characterization, *in vivo* bio-evaluation, toxicological effectiveness, and study mode of action**

**Doaa M. Elsisy<sup>1</sup>, Moustafa S. Abusaif<sup>2,\*</sup>, Eman EL-Said<sup>3,\*</sup>, Enayat M. Elqady<sup>3</sup>, Mohamed A. Salem<sup>4</sup>, Yousry A. Ammar<sup>2</sup>, Ahmed Ragab<sup>2,5,\*</sup>**

<sup>1</sup> Department of Chemistry, Faculty of Science (girls), Al-Azhar University, 11754 Nasr City, Cairo-Egypt

<sup>2</sup> Department of Chemistry, Faculty of Science (boys), Al-Azhar University, 11884 Nasr City, Cairo-Egypt

<sup>3</sup> Zoology and Entomology Department, Faculty of Science, Al-Azhar University (girls), Cairo, Egypt

<sup>4</sup> Department of Chemistry, Faculty of Science and Arts, King Khalid University, Mohail, Assir, Saudi Arabia

<sup>5</sup> Chemistry Department, Faculty of Science, Galala University, Galala City, 43511, Suez, Egypt

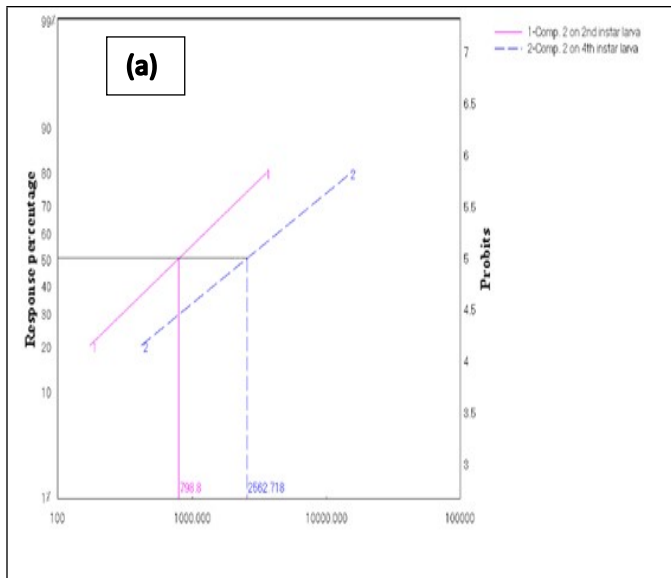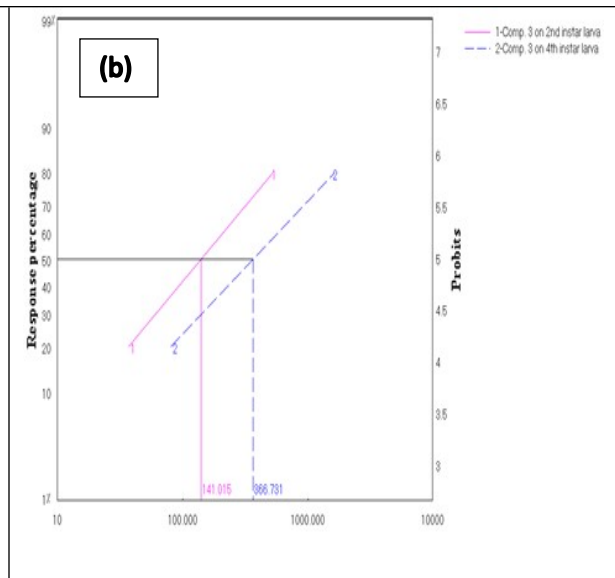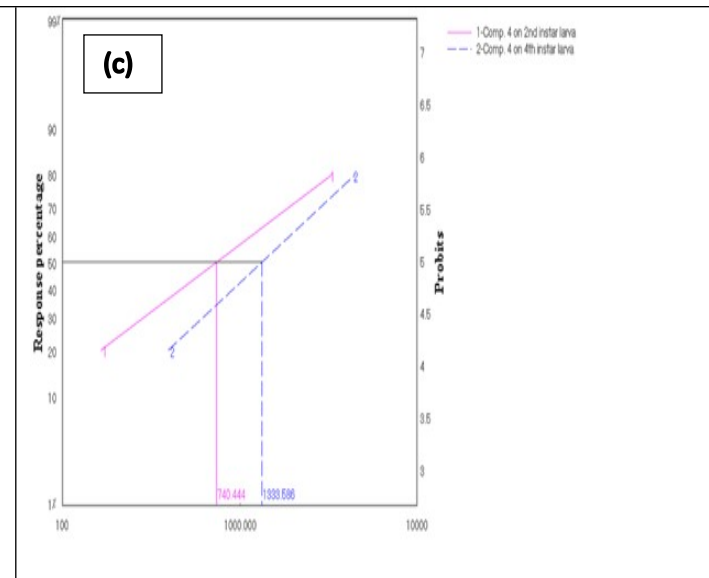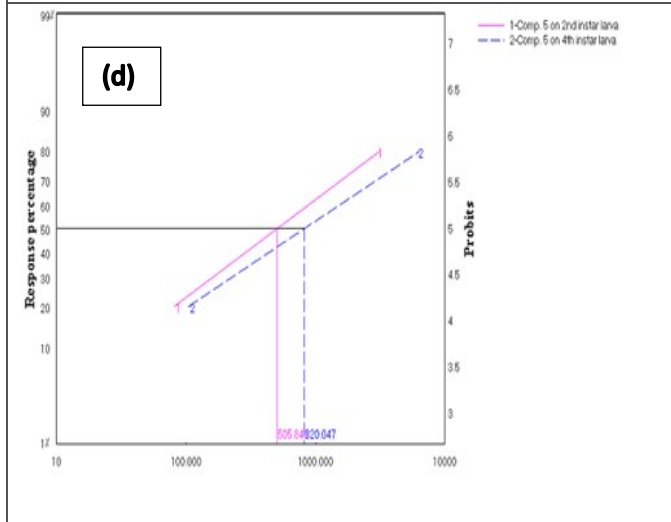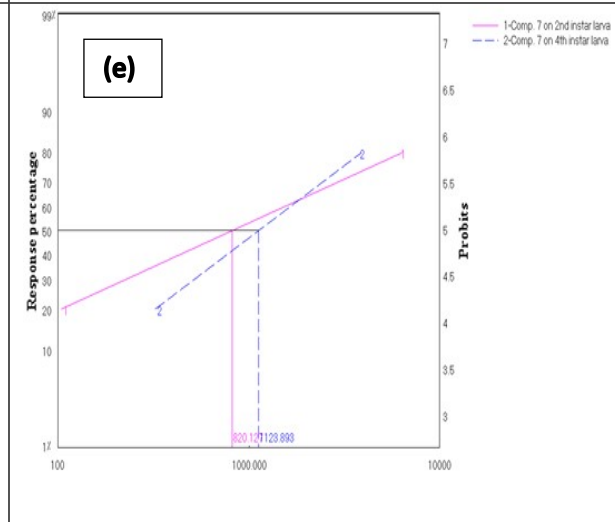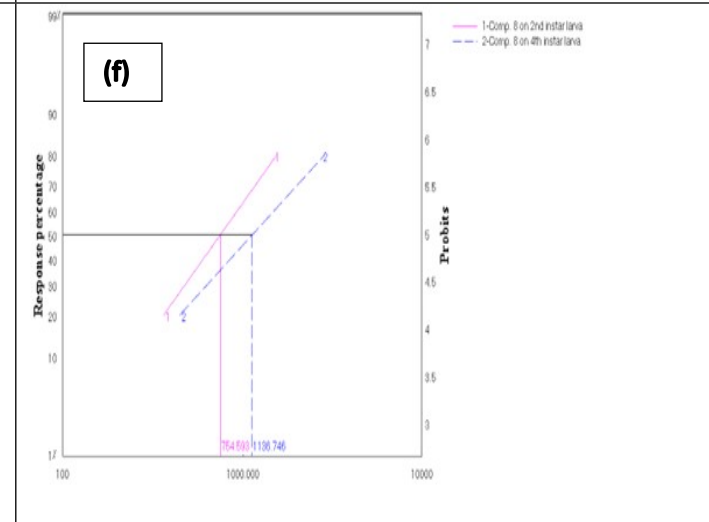

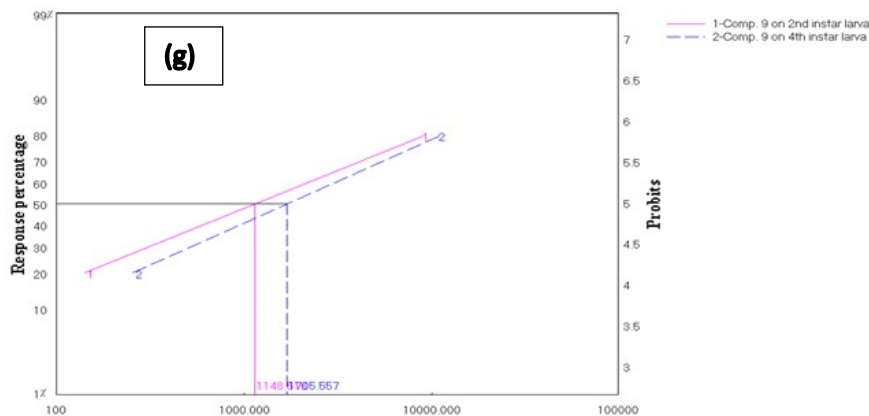

**Figure (SI1):** Regression lines representing toxicity of tested newly designed quinoxaline derivative **2-5** and **7-9** against 2<sup>nd</sup> & 4<sup>th</sup> larval instar of *S. litura* after 5 days from the treatment, where (a) compound **2**; (b) compound **3**; (c) compound **4**; (d) compound **5**; (e) compound **7**; (f) compound **8**; and (g) compound **9**

### 1.1.Chemistry

All reagents and chemicals were purchased from Aldrich Chemicals without further purification, while solvents were obtained from Fisher. Melting points (MPs) of the newly designed compounds were measured using open capillaries on a digital Gallen Kamp MFB-595 instrument. IR spectra were acquired using the KBr disc methodology on a Shimadzu 440 spectrophotometer in the range of 400–4000  $\text{cm}^{-1}$ . NMR spectra ( $^1\text{H}/^{13}\text{C}$ ) were recorded on a JOEL spectrometer 400/101 MHz using  $\text{DMSO-}d_6$  as the solvent, with chemical shifts measured in  $\delta$  ppm relative to TMS as an internal standard (=0 ppm). The data were presented in the following format: chemical shift, multiplicity (br. = broad, m = multiplet, q = quartet, t = triplet, d = doublet, and s = singlet), coupling constant ( $J$ ) in Hertz (Hz), and integration. Elemental studies were conducted at the Micro Analytical Unit of Cairo University in Cairo. Mass spectra were obtained at 70 eV using the DI-50 unit of a Shimadzu GC/MSQP5050A Spectrometer at the Regional Center for Biotechnology of Al-Azhar University.

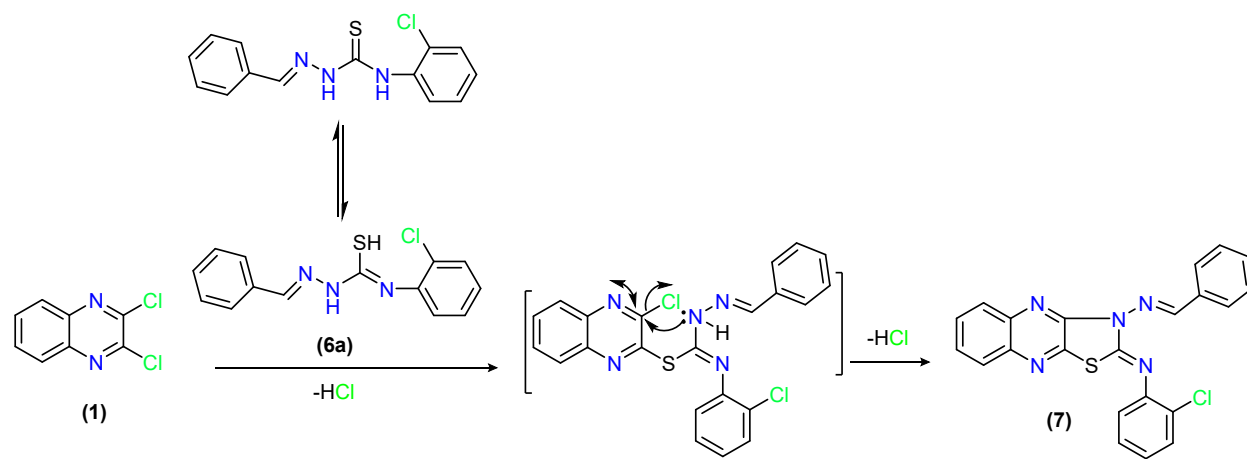

**Scheme SI:** The mechanistic equation of bioactive thiazolo-quinoxaline compounds **7**

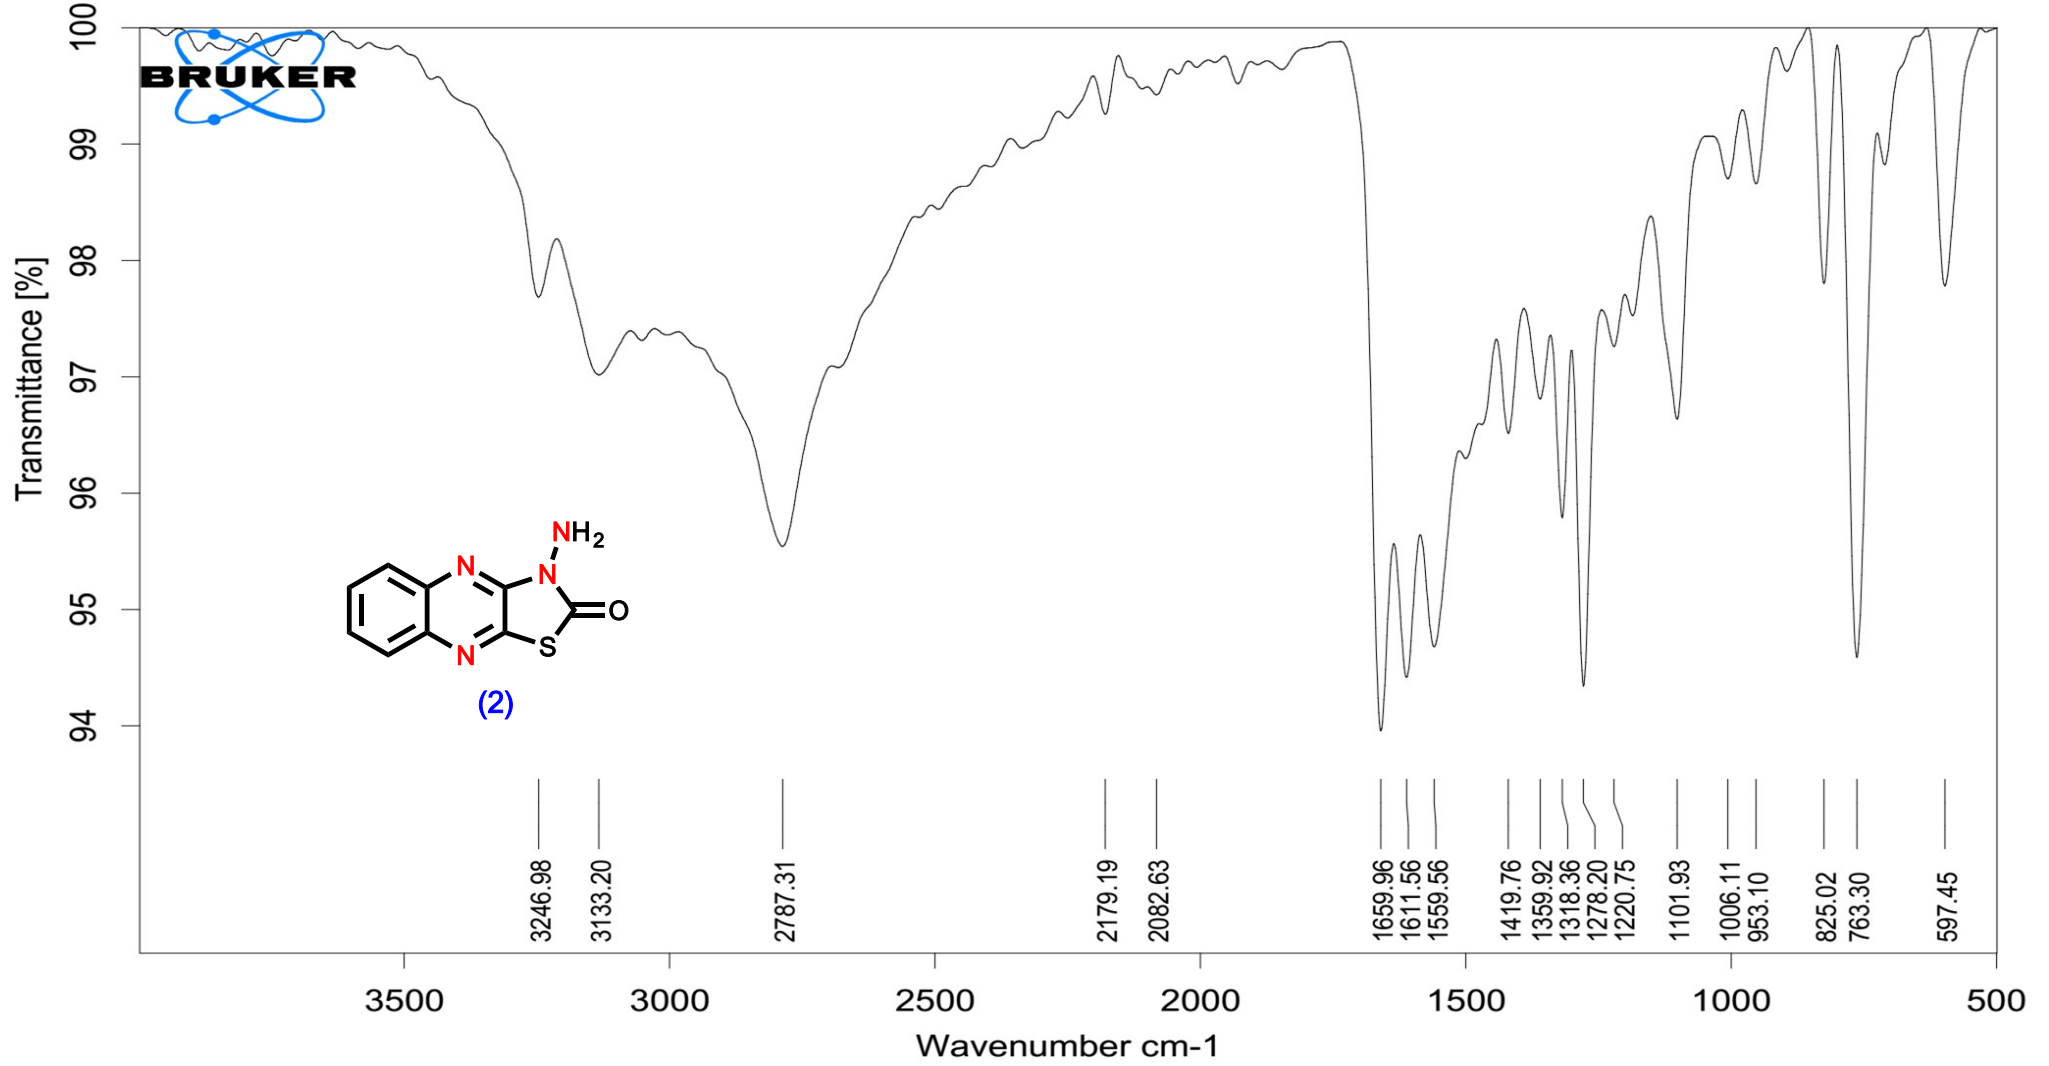

H NMR (2)

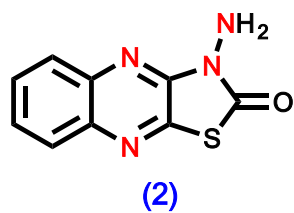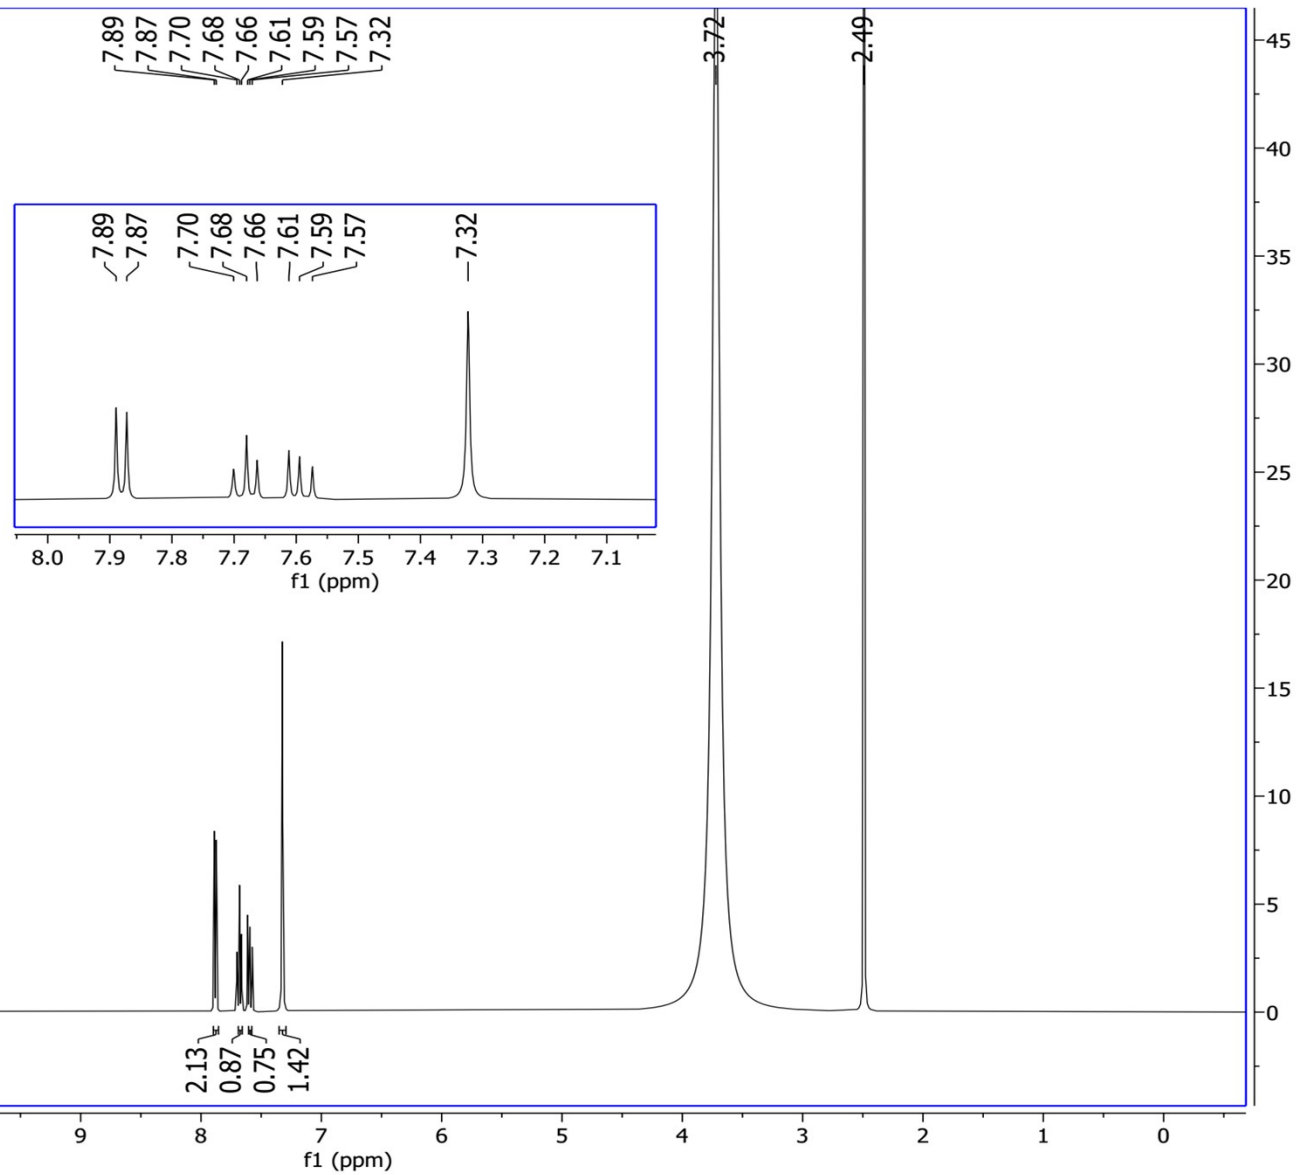

C NMR (2)

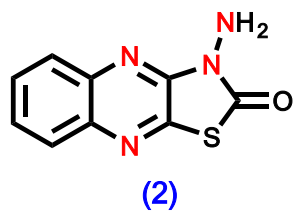

155.15  
144.59  
140.01  
137.05  
135.48  
131.77  
130.29  
127.64  
125.42

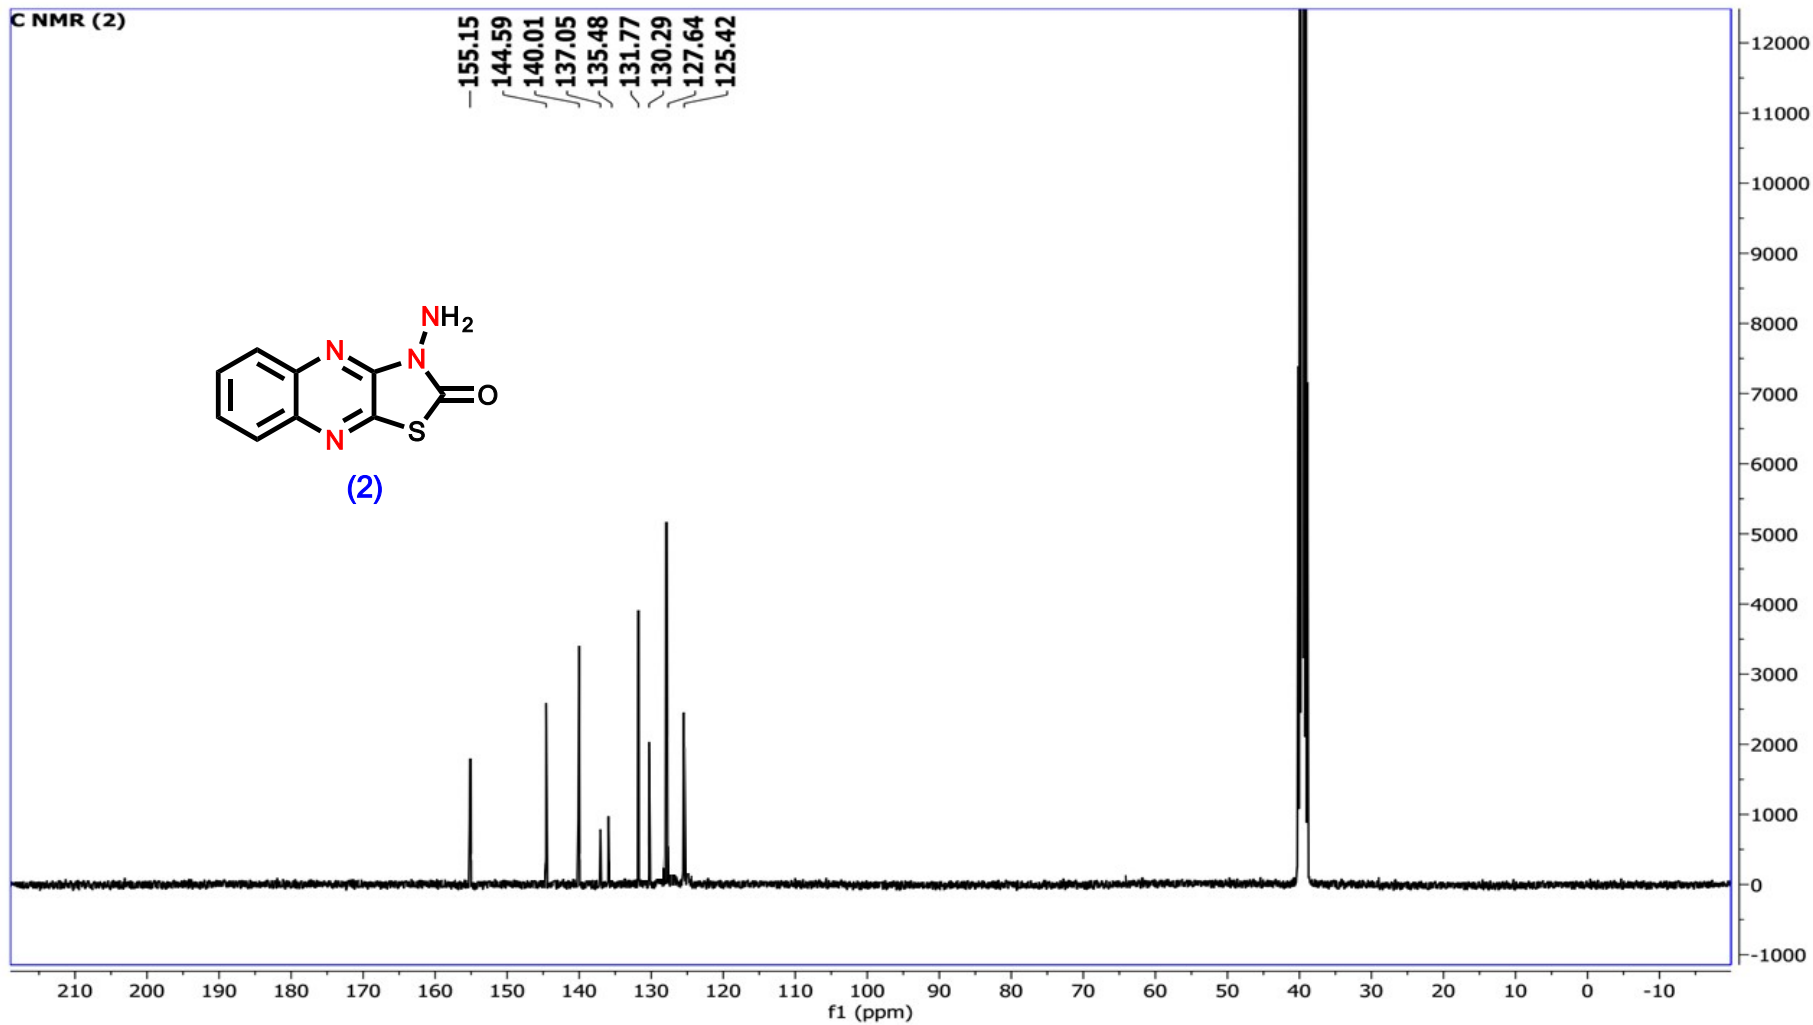

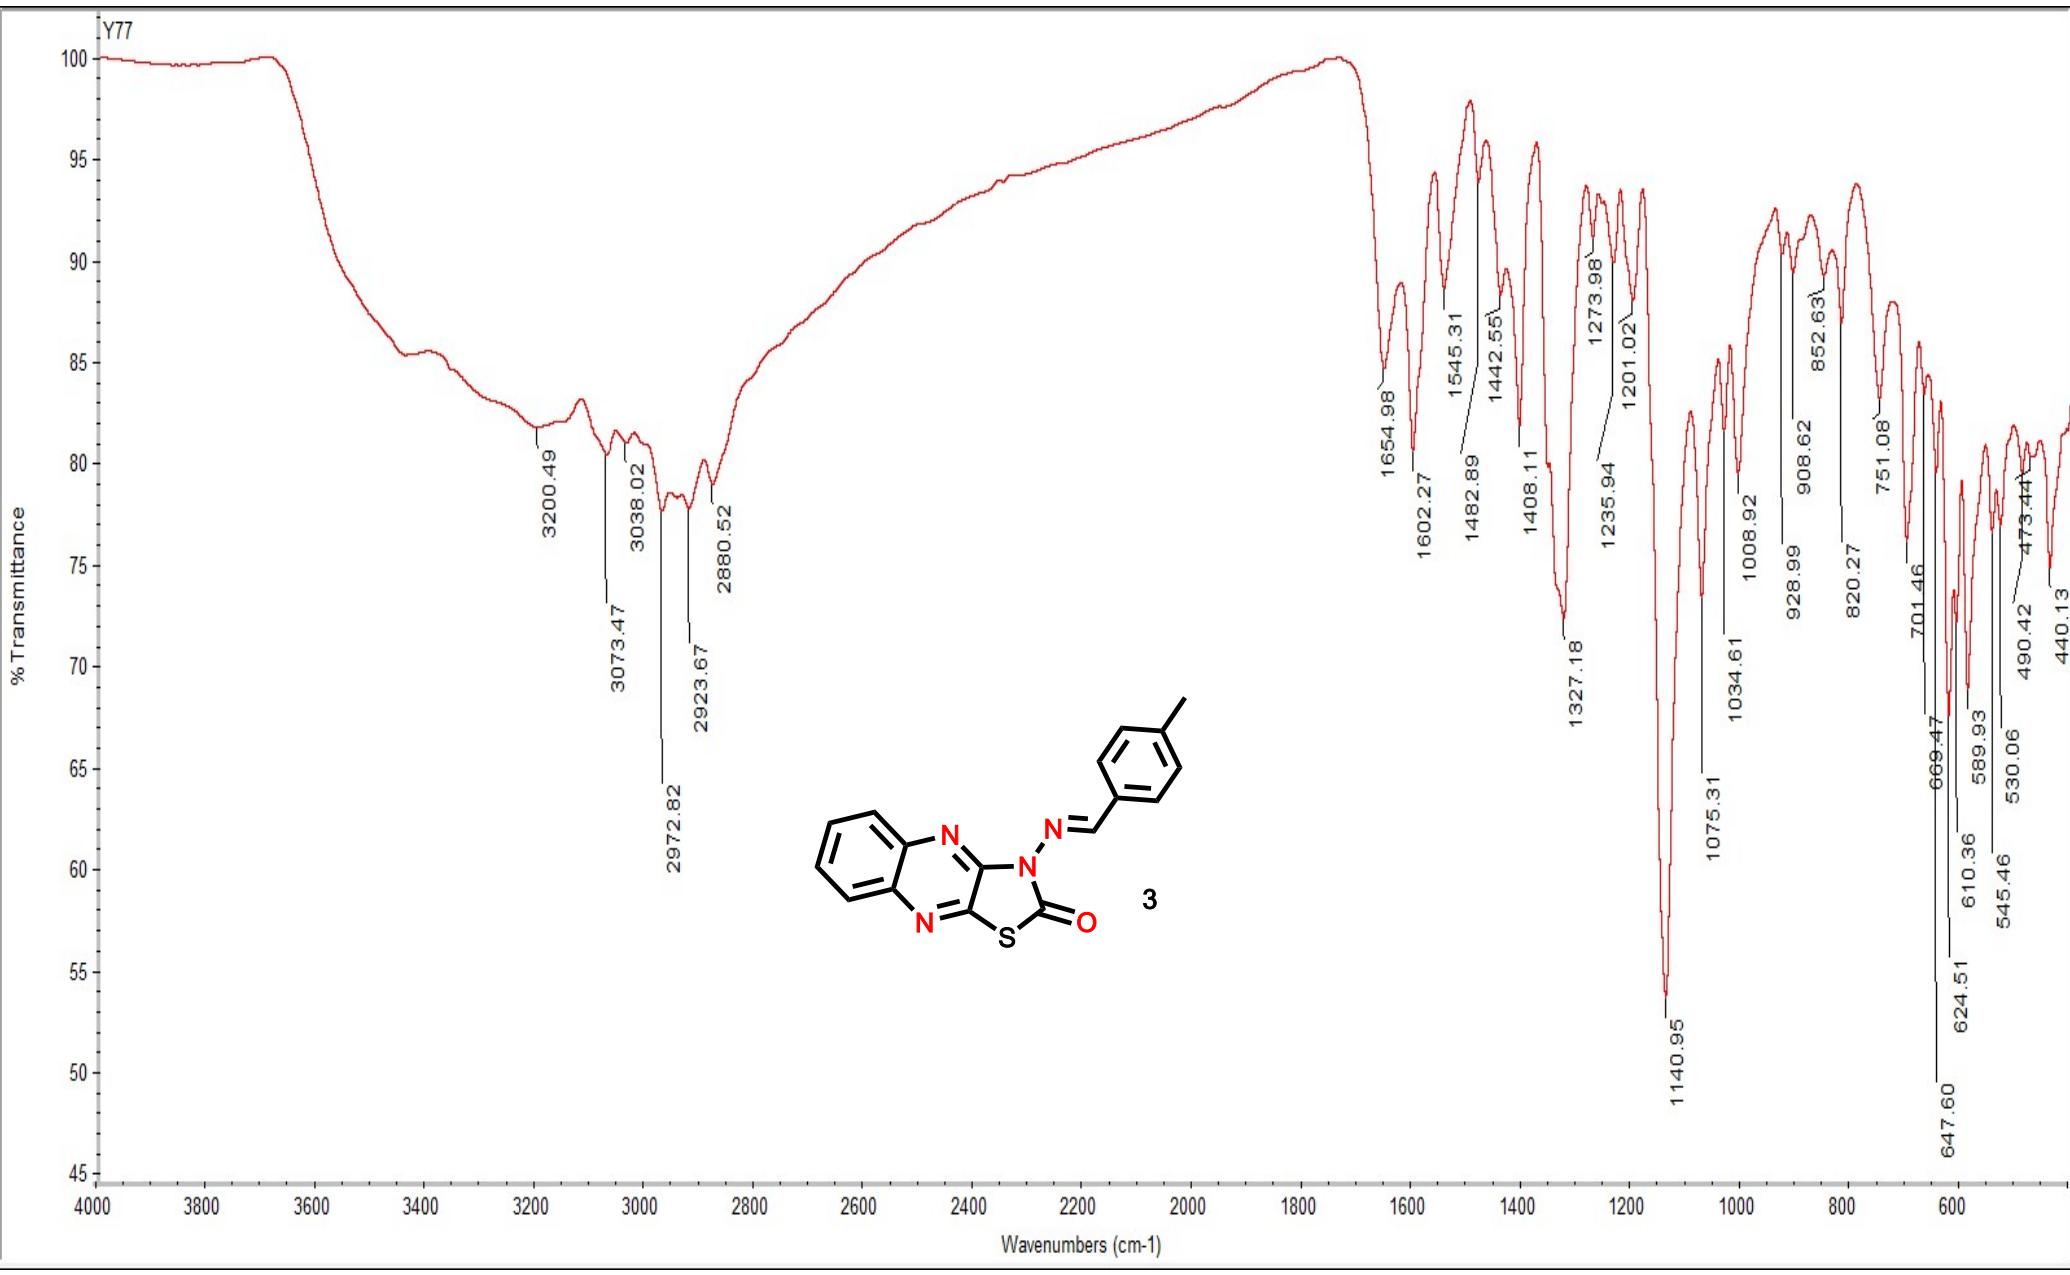



H (3)

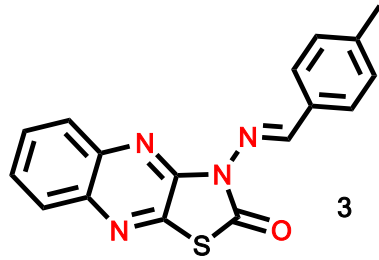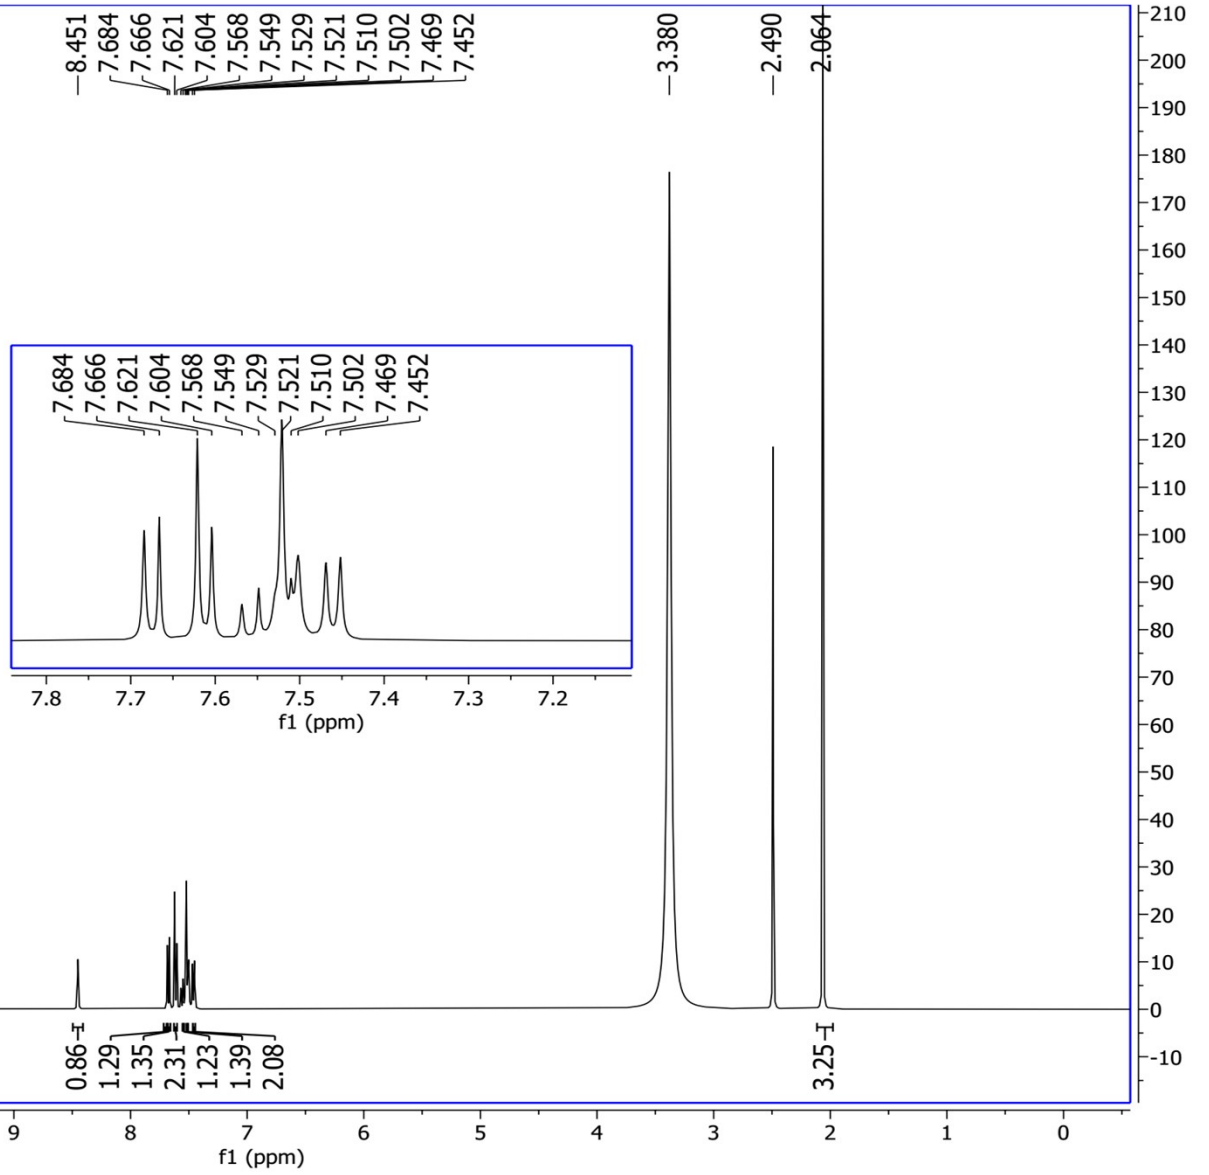

C3

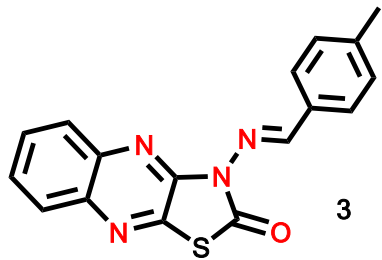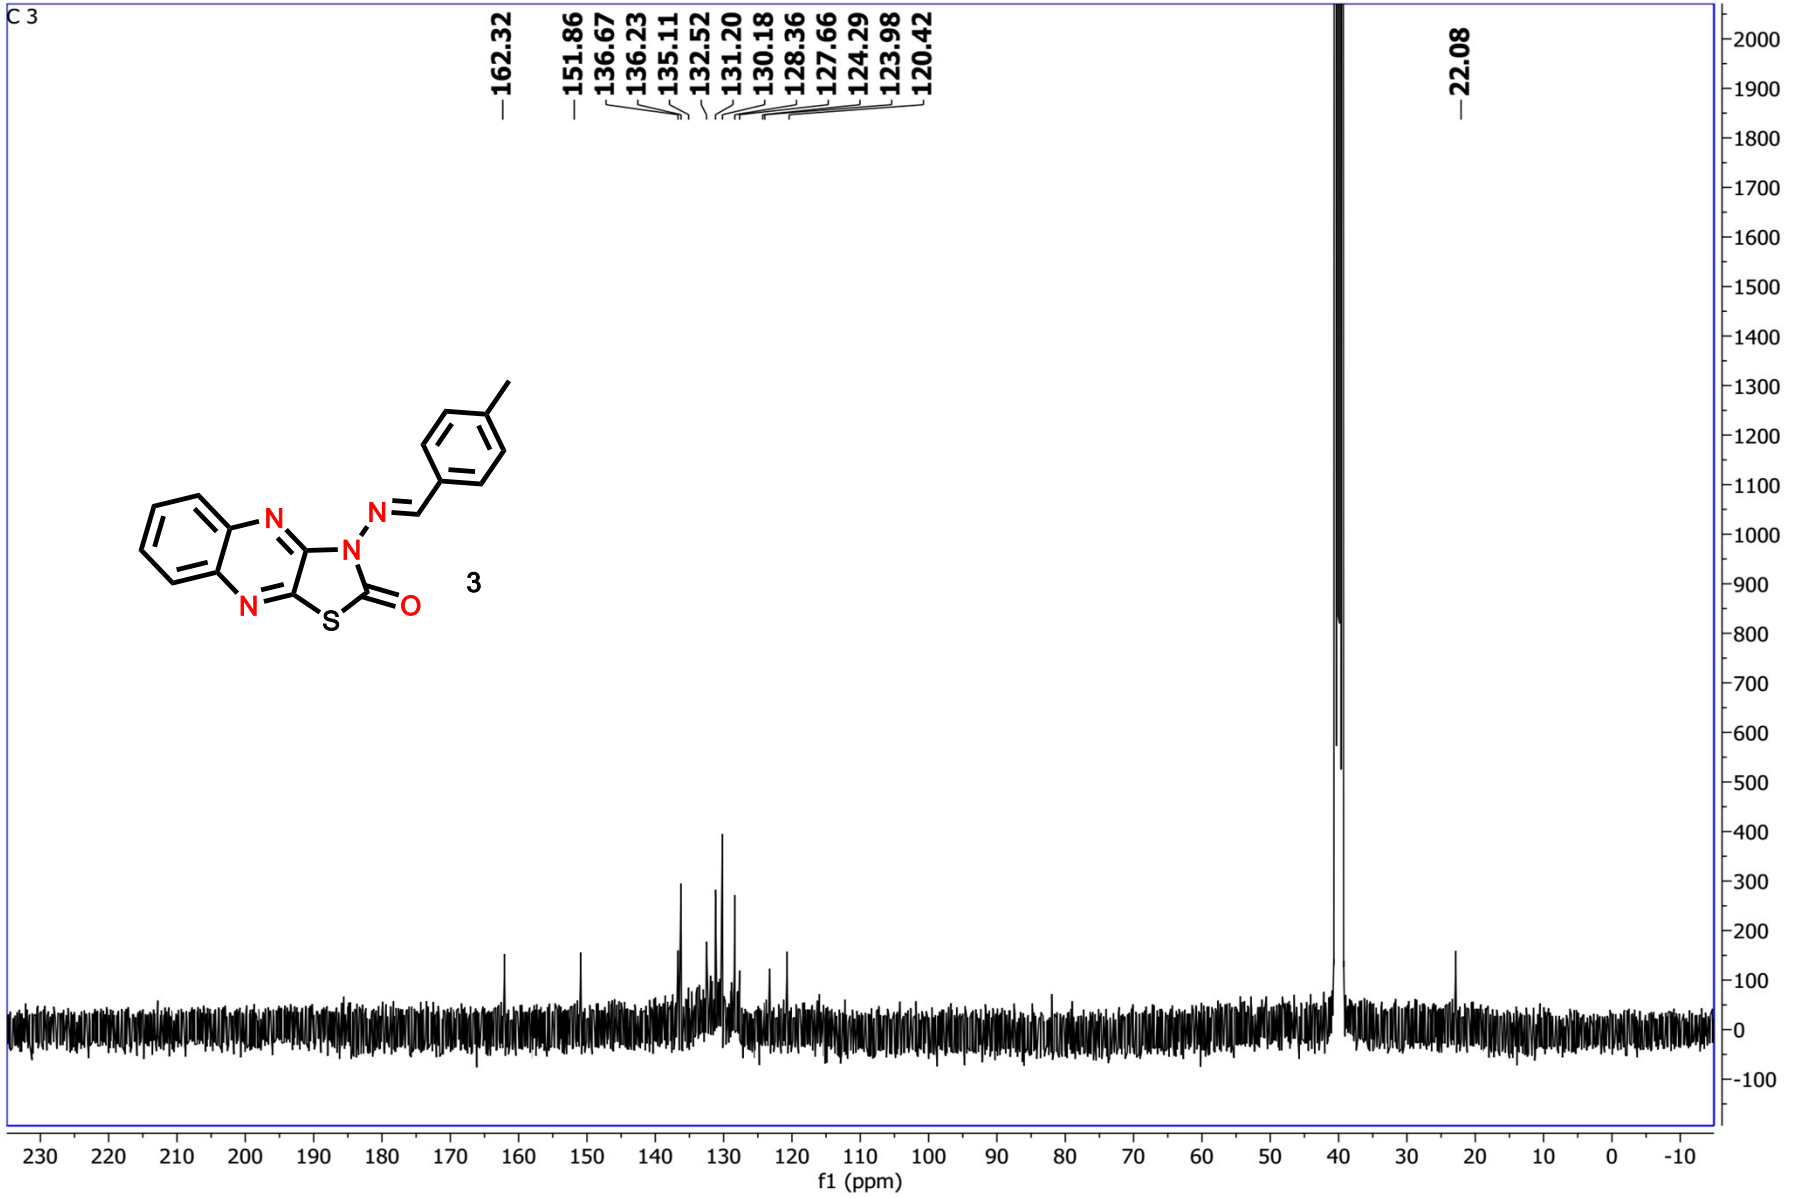

C #199 RT: 3.35 P: + SB: 2 3.23, 3.25 NL: 252E3  
 T: {0,0} + eEI Full ms [40.00-1000.00]

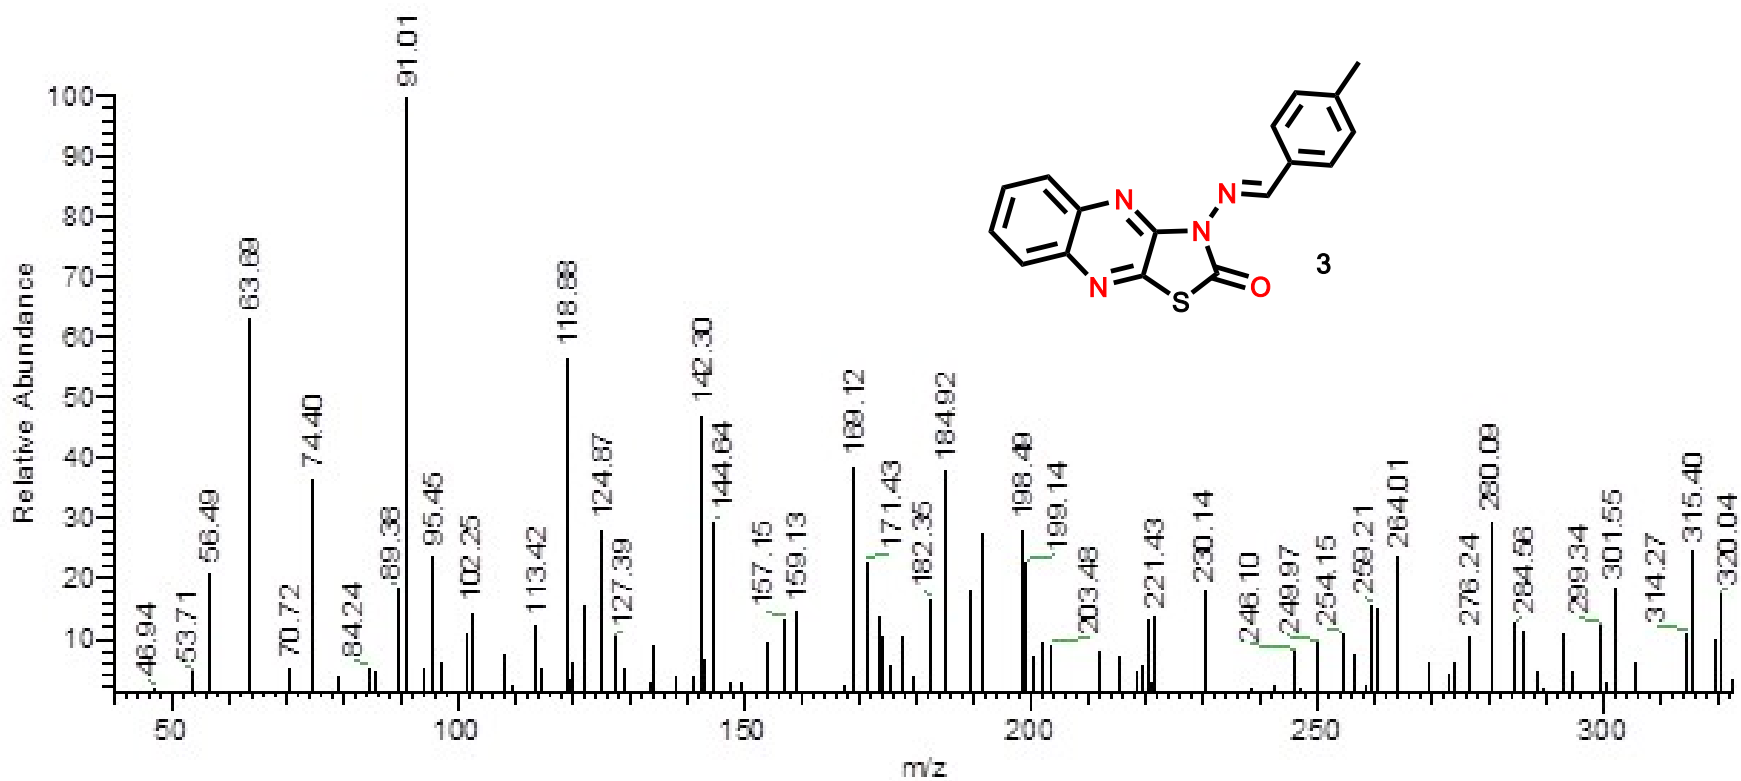

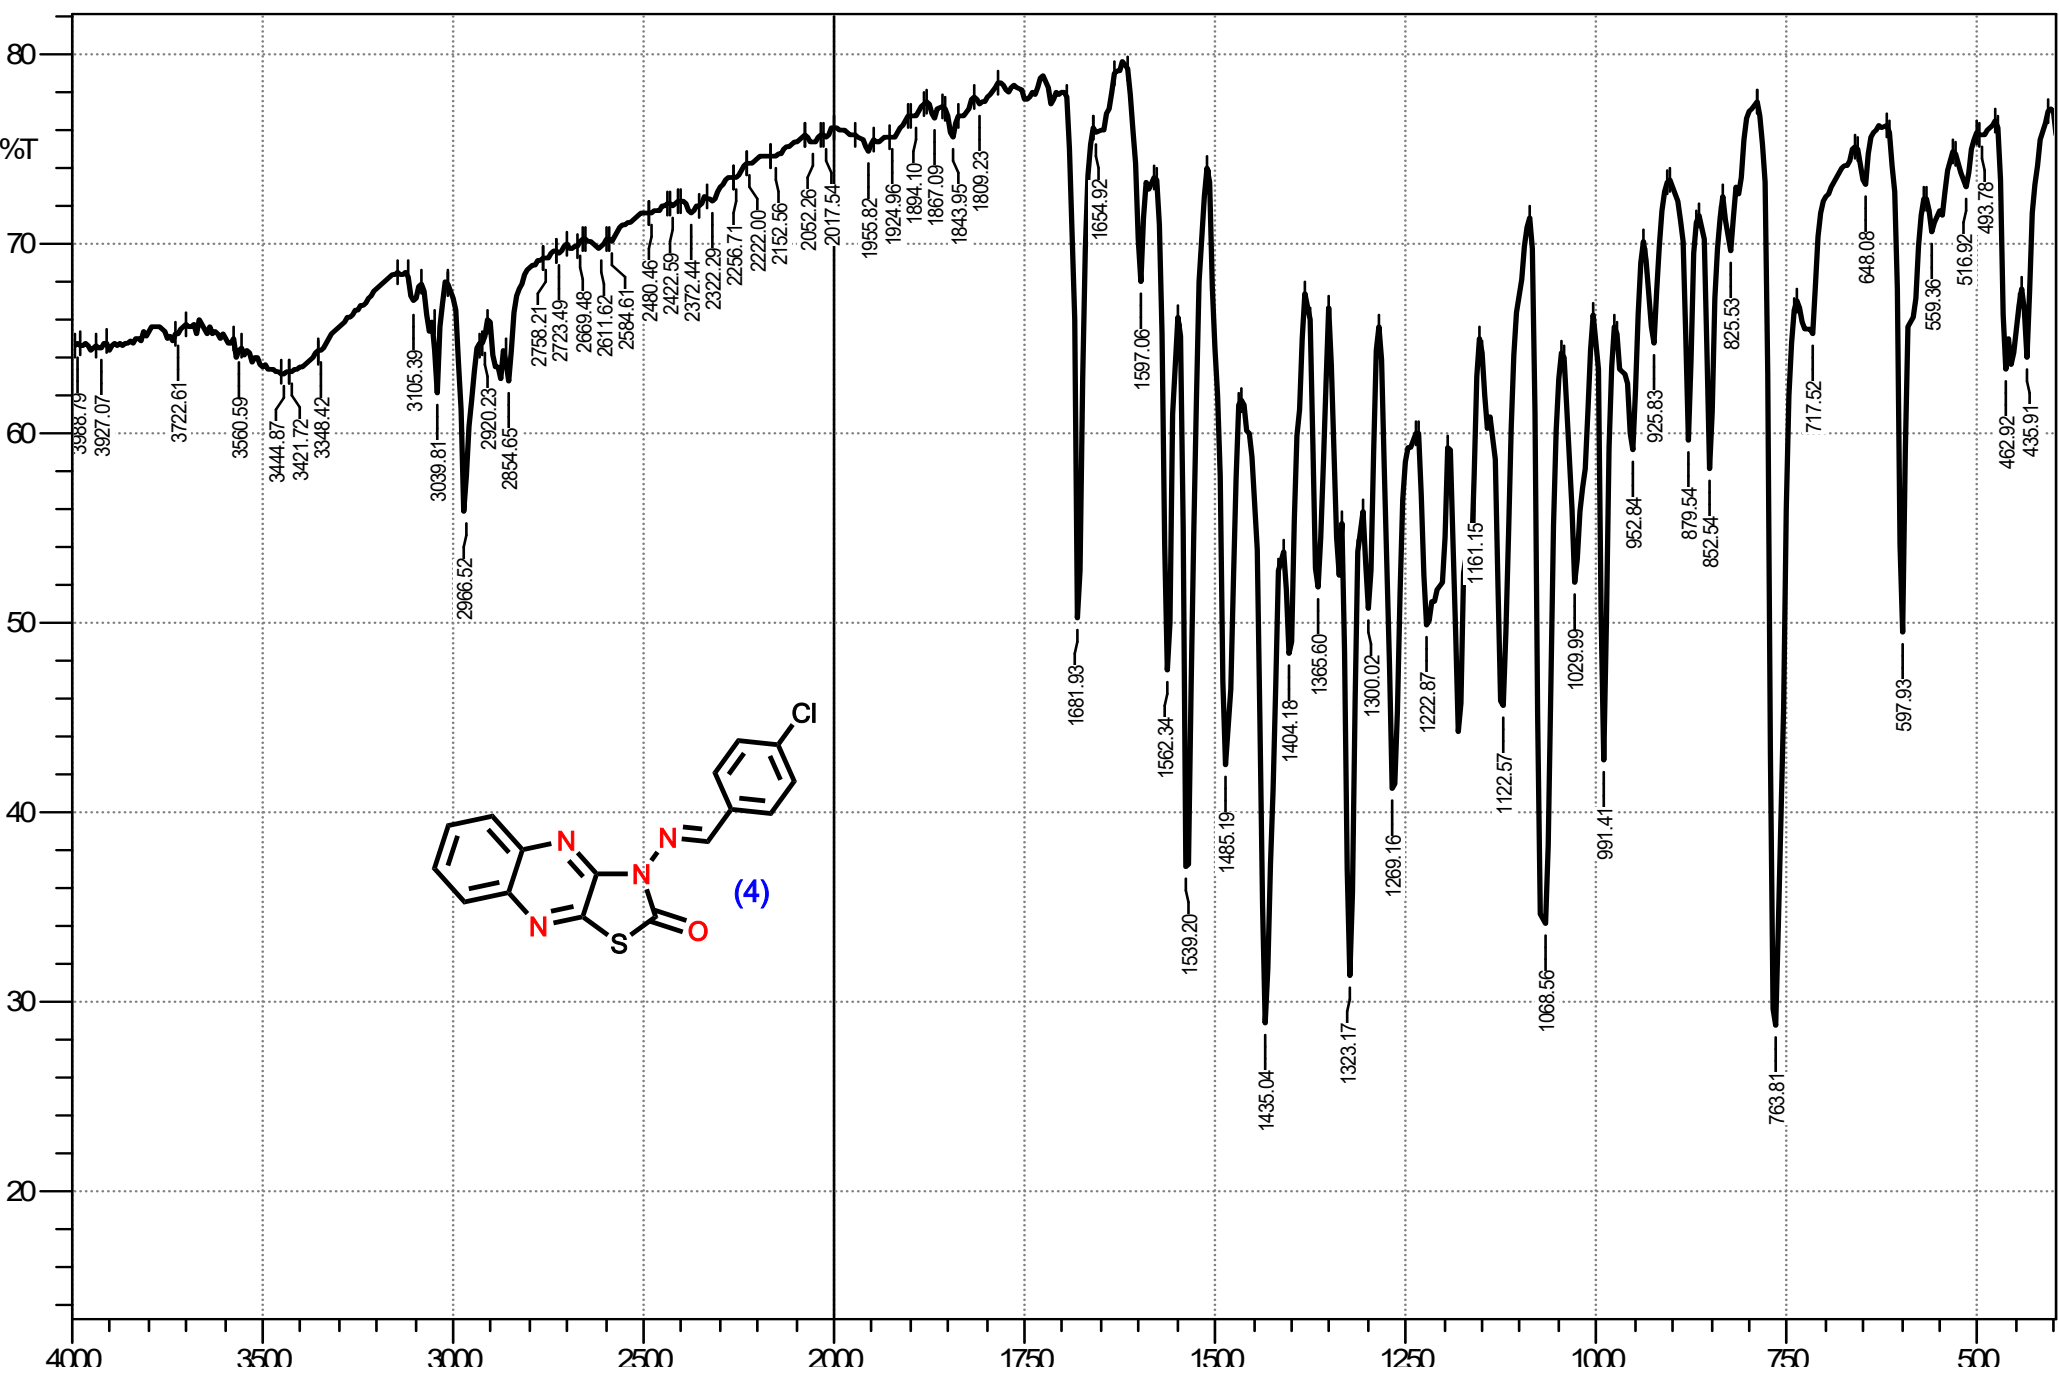

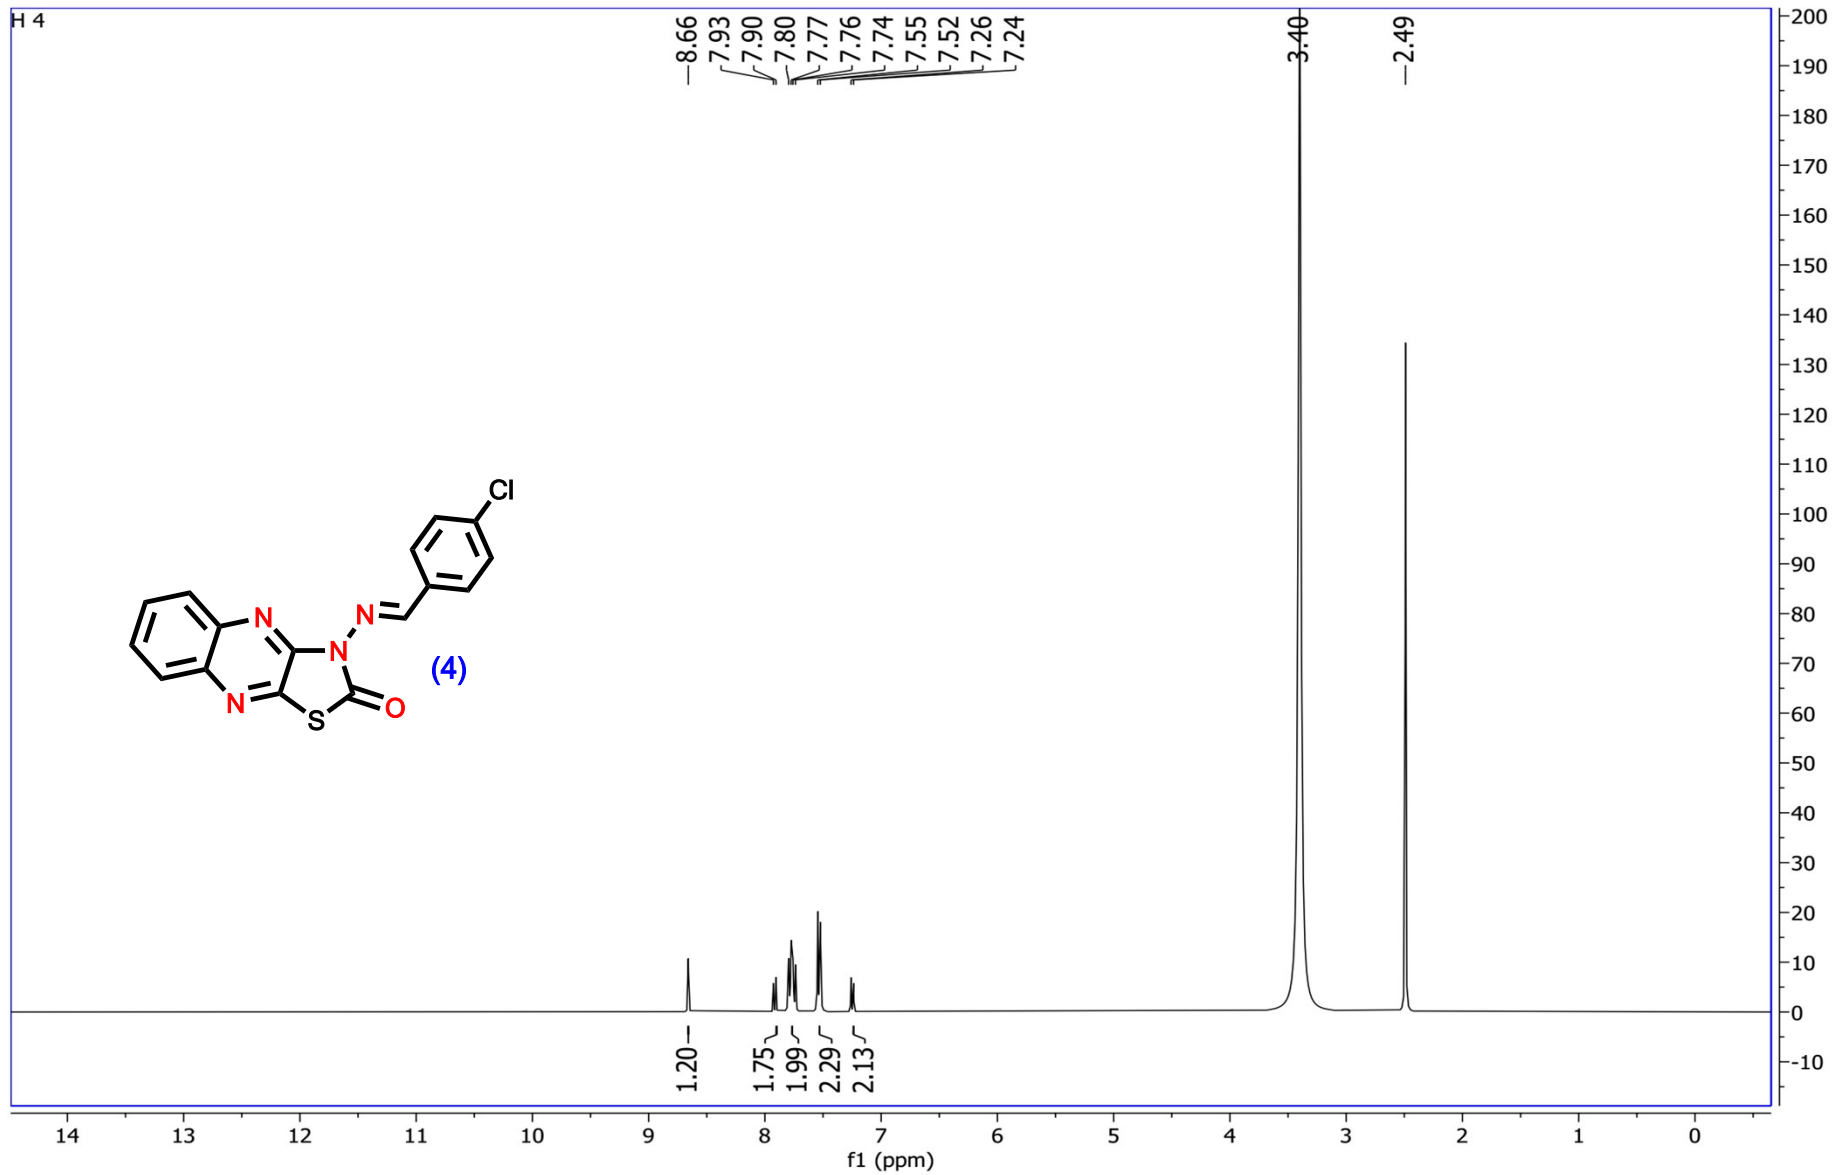

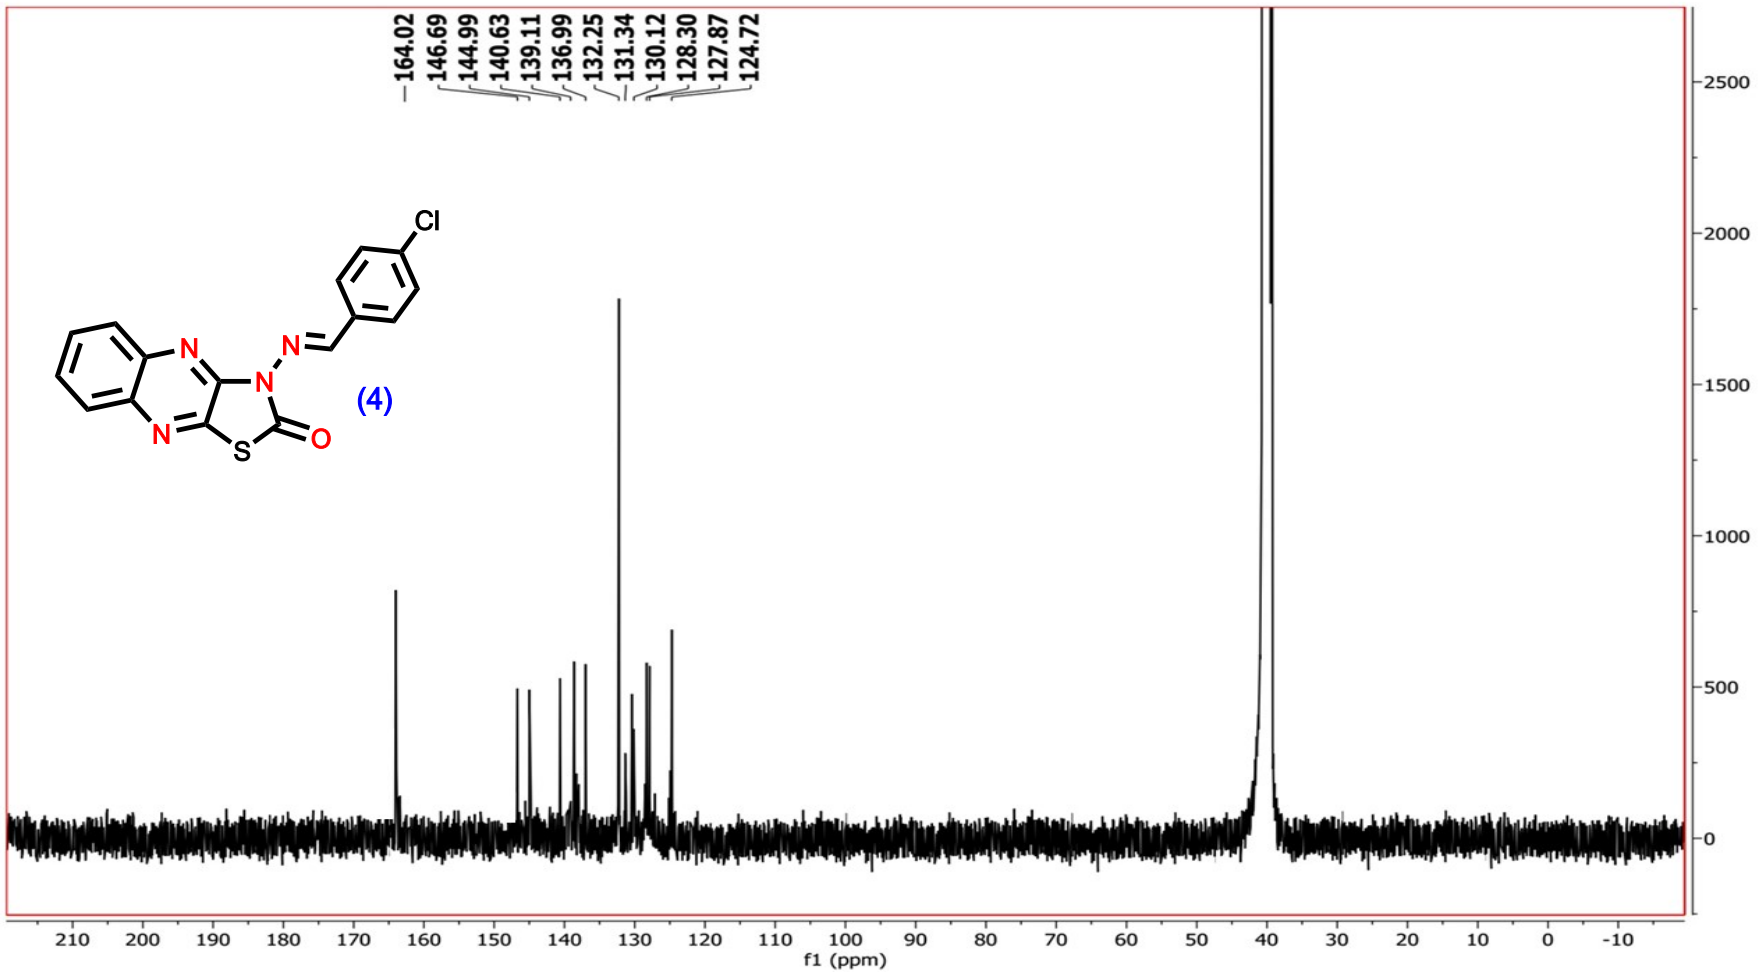

L2 #177 RT: 2.98 P: + NL: 3.39E2

T: {0,0} + e EI Full ms [40.00-1000.00]

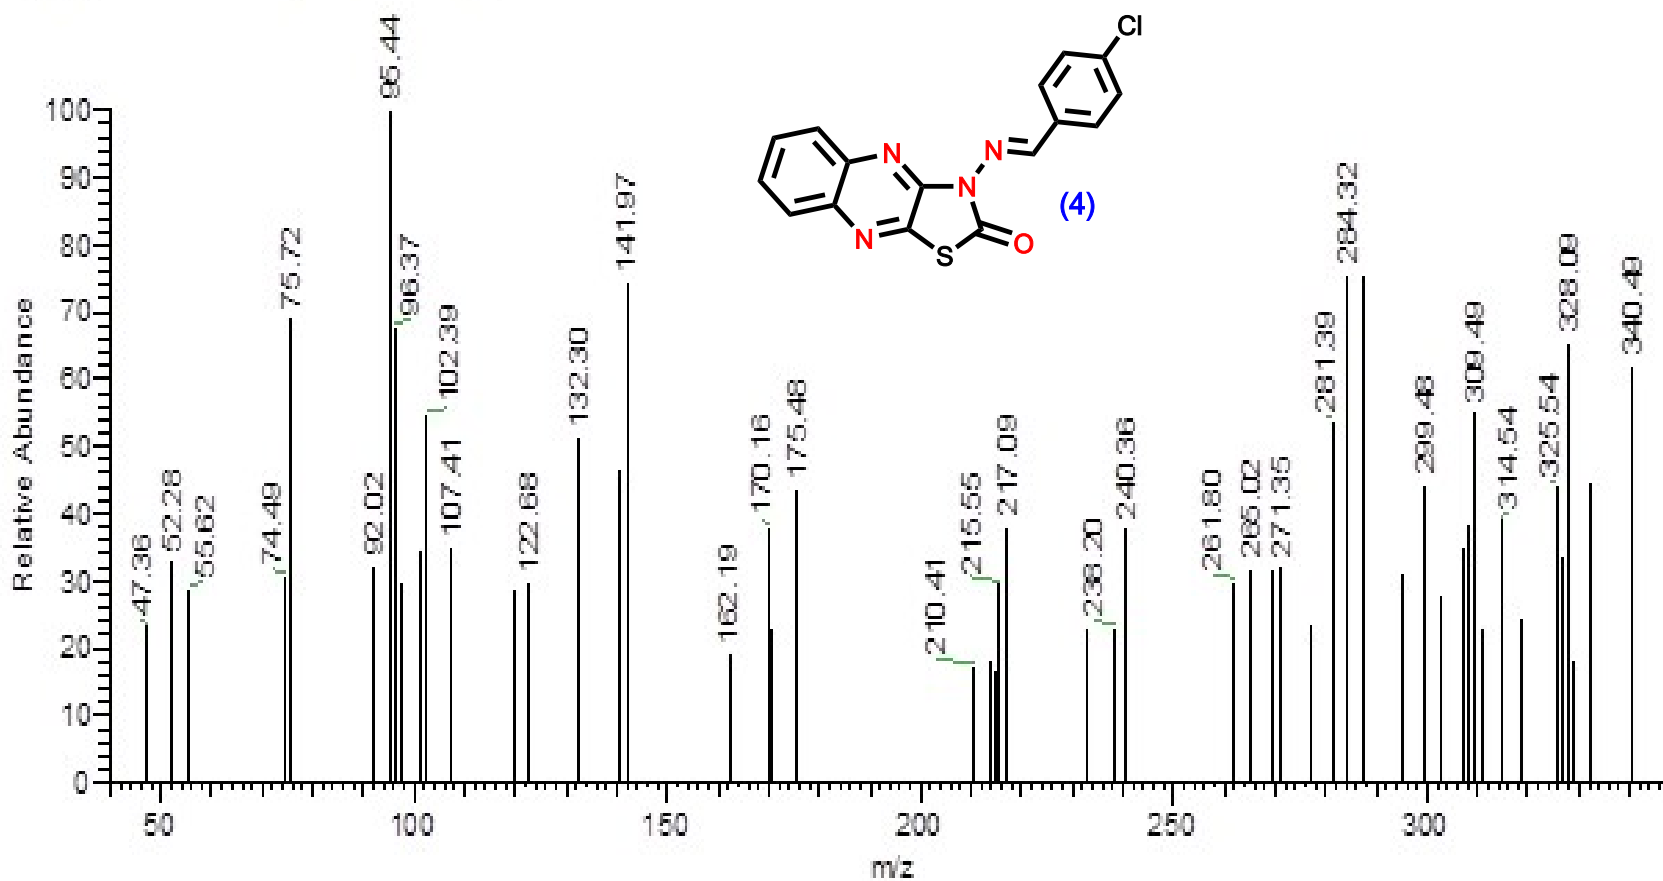

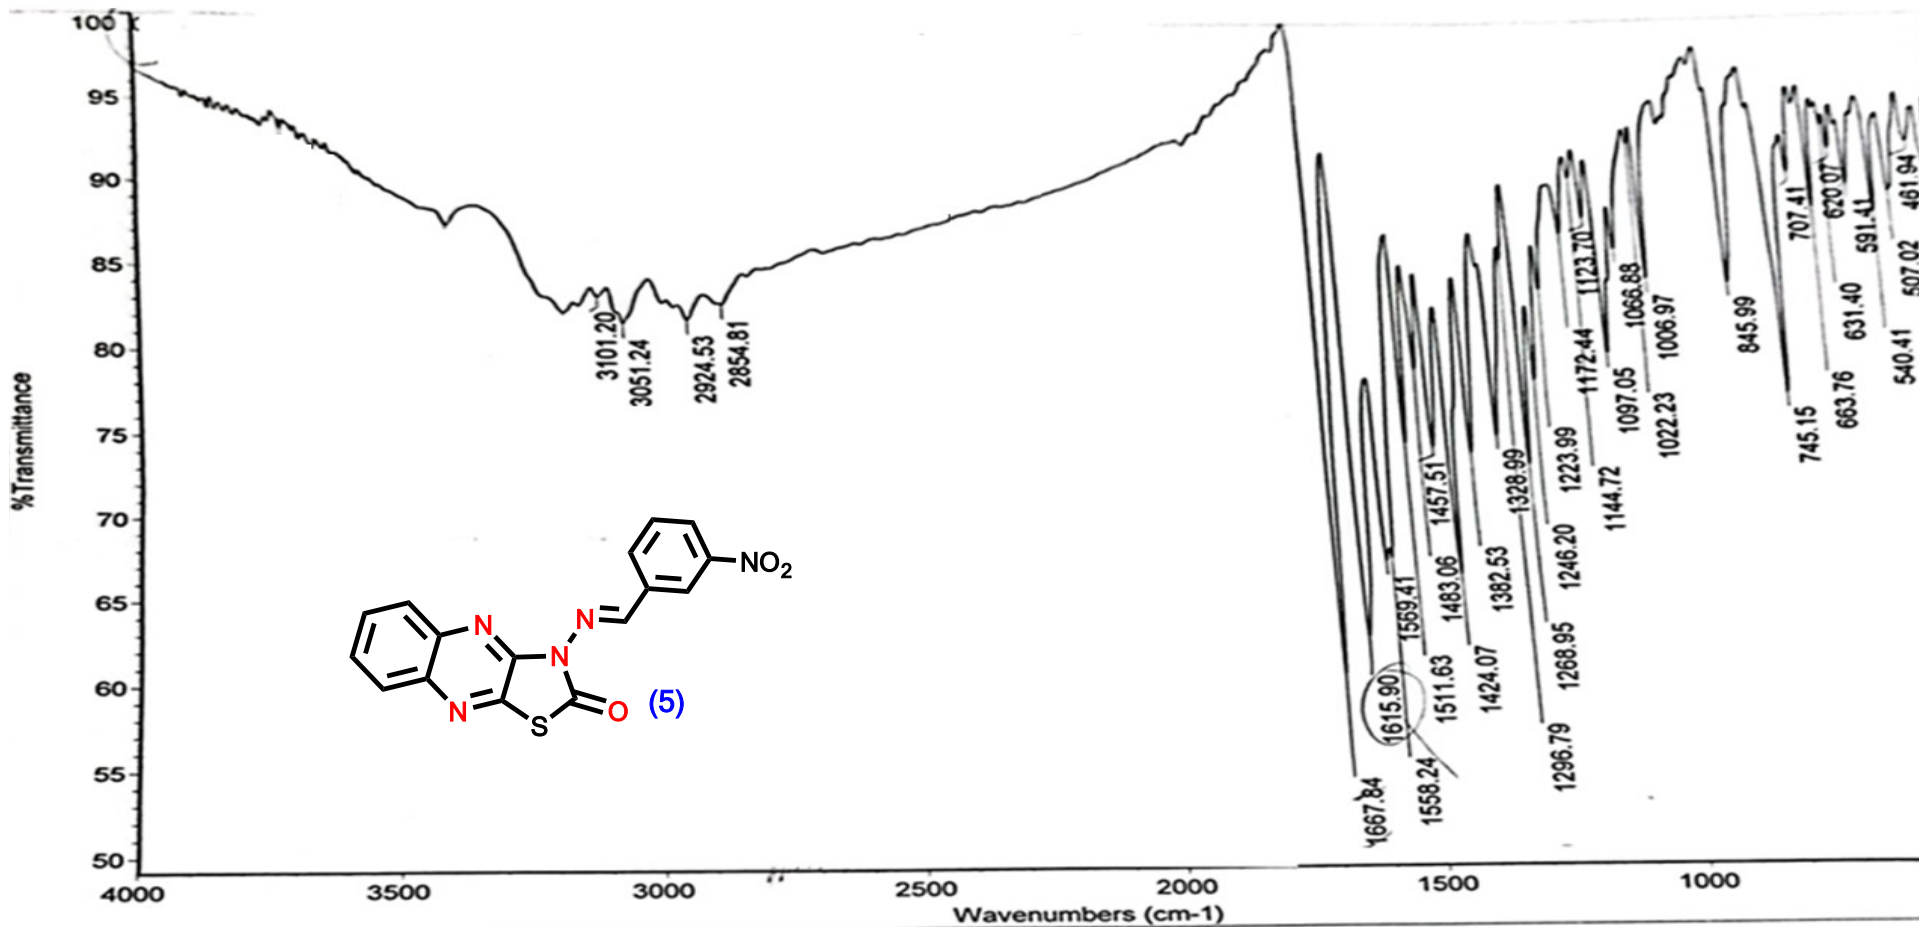



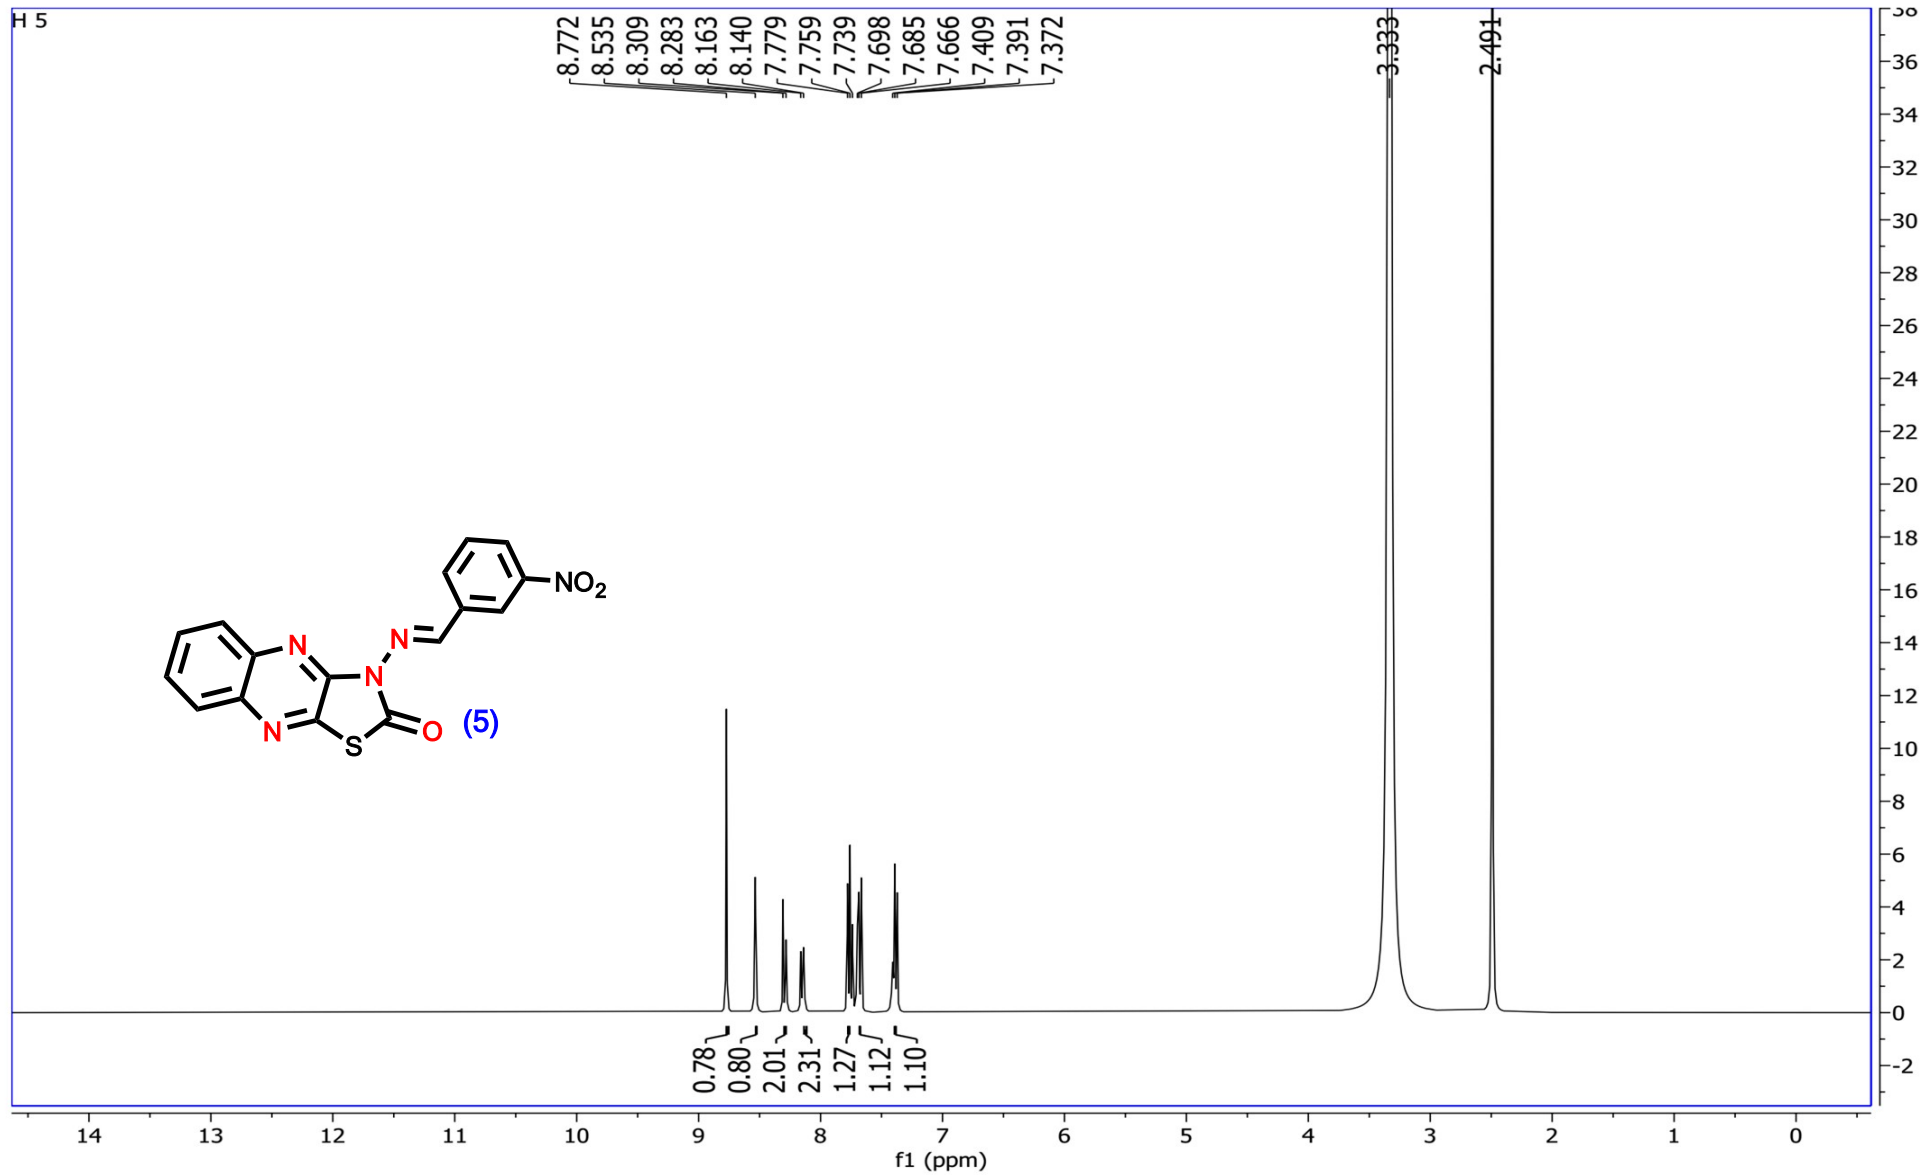

L5 #72 RT: 1.22 P: + NL: 2.41E2  
 T: {0,0} + eEI Full ms [40.00-1000.00]

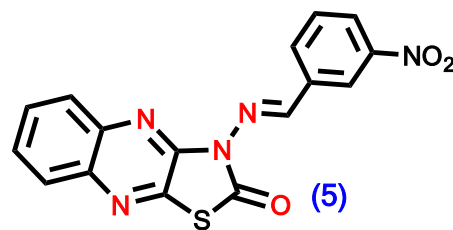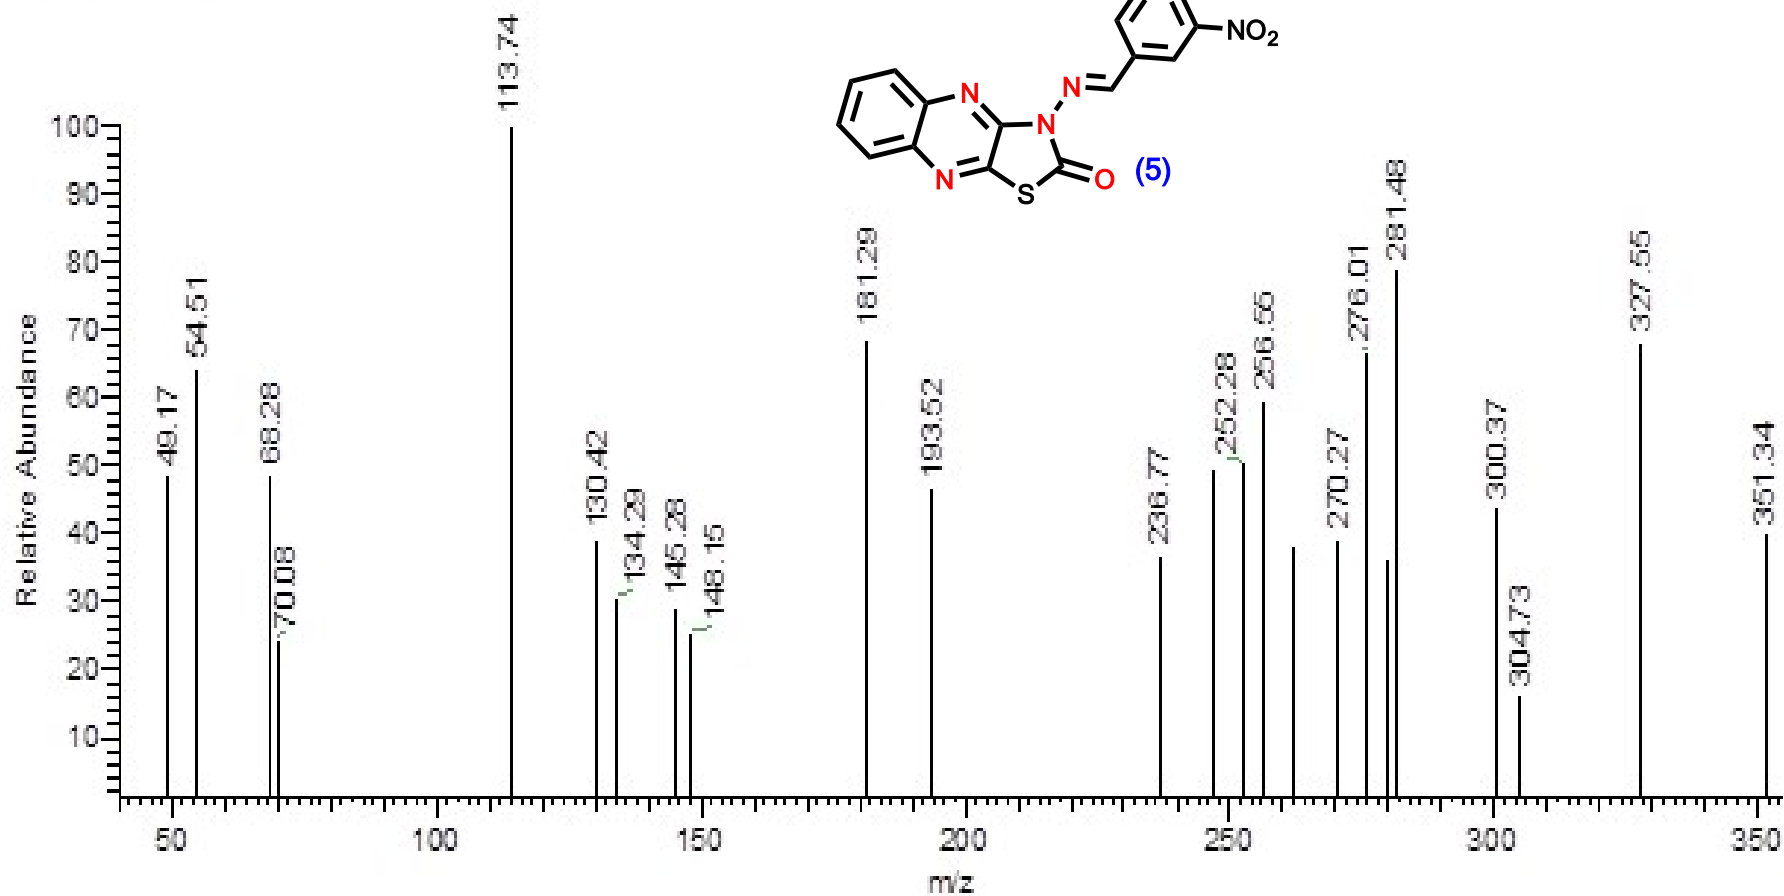

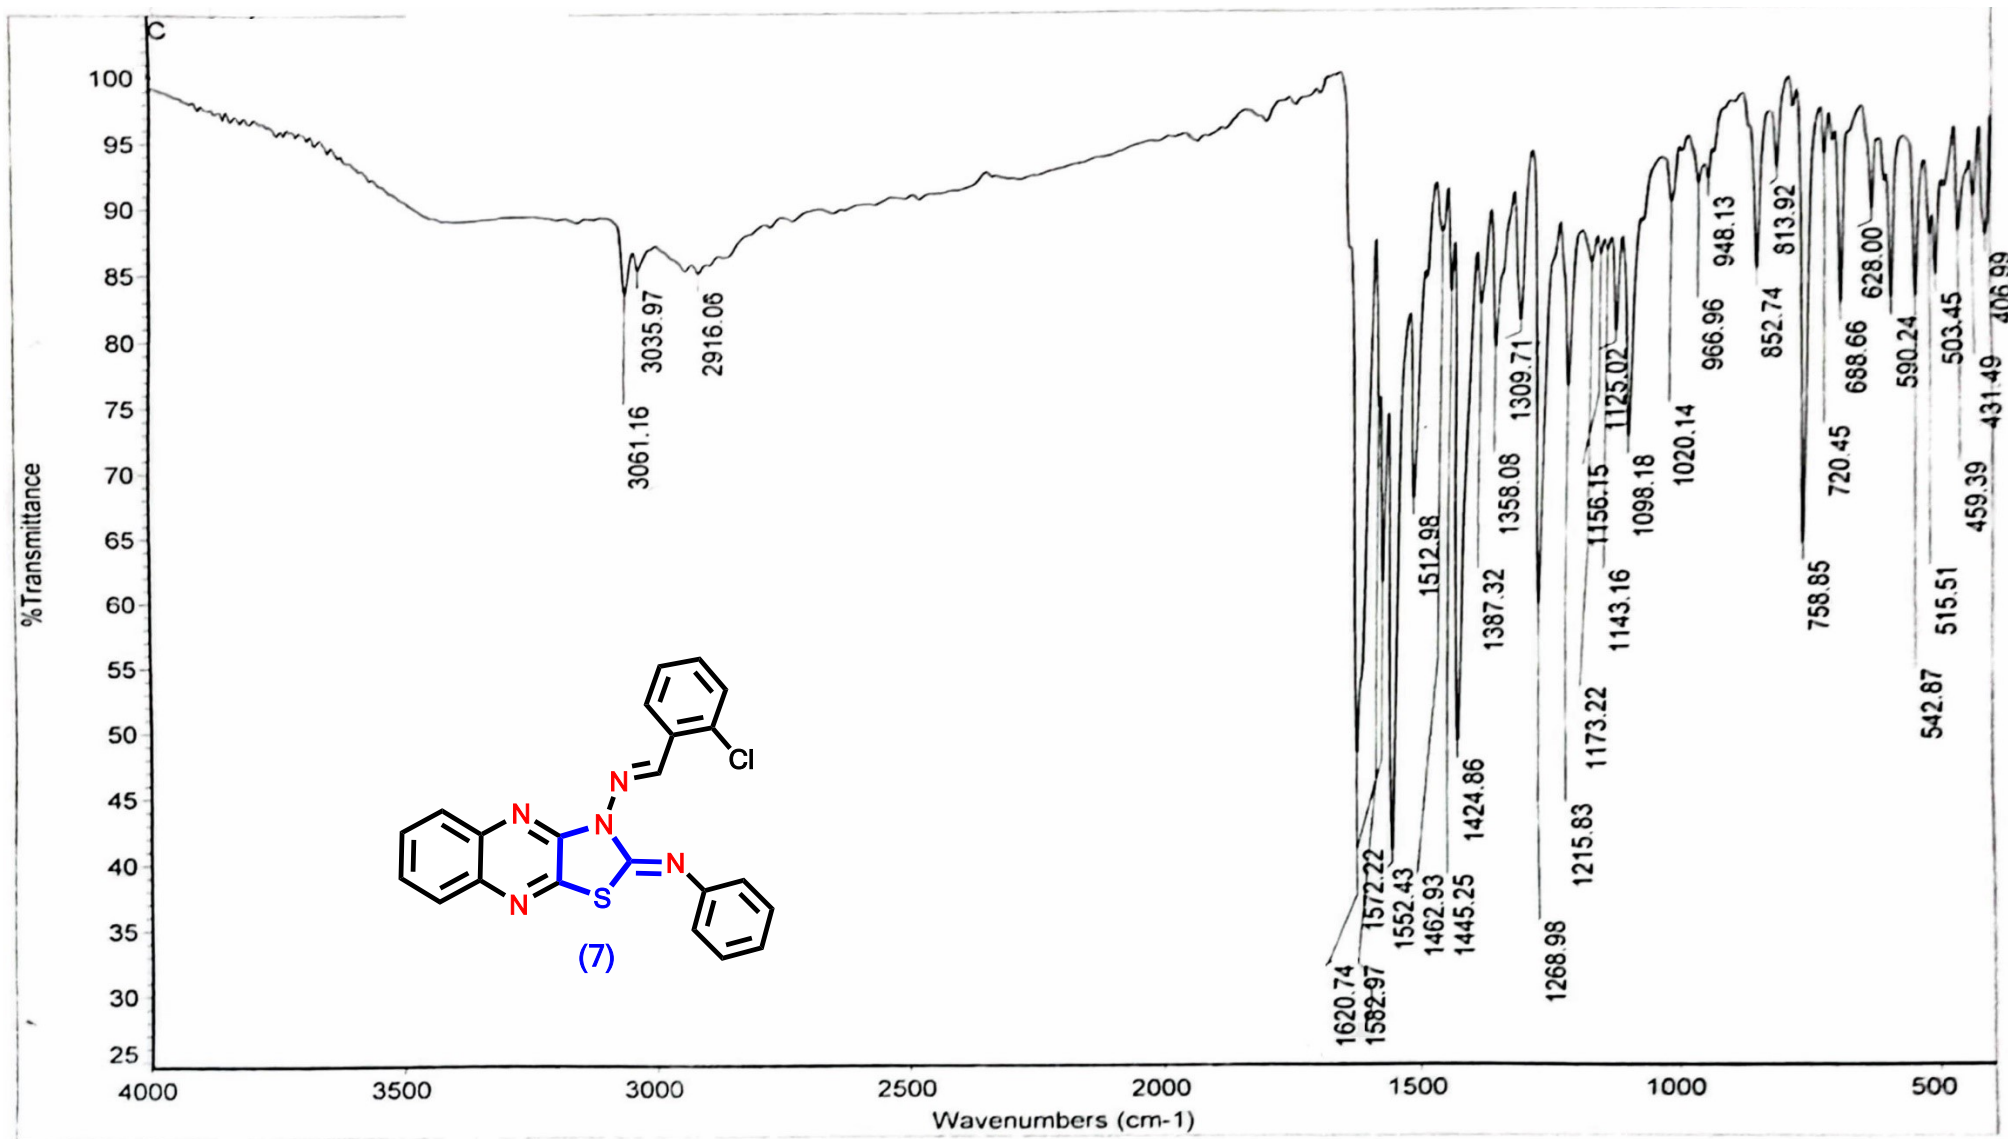

H C7

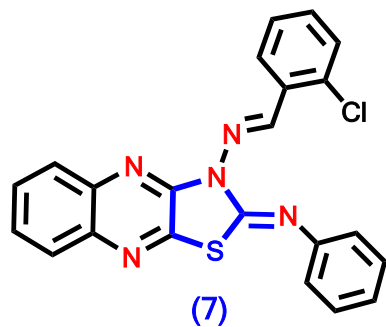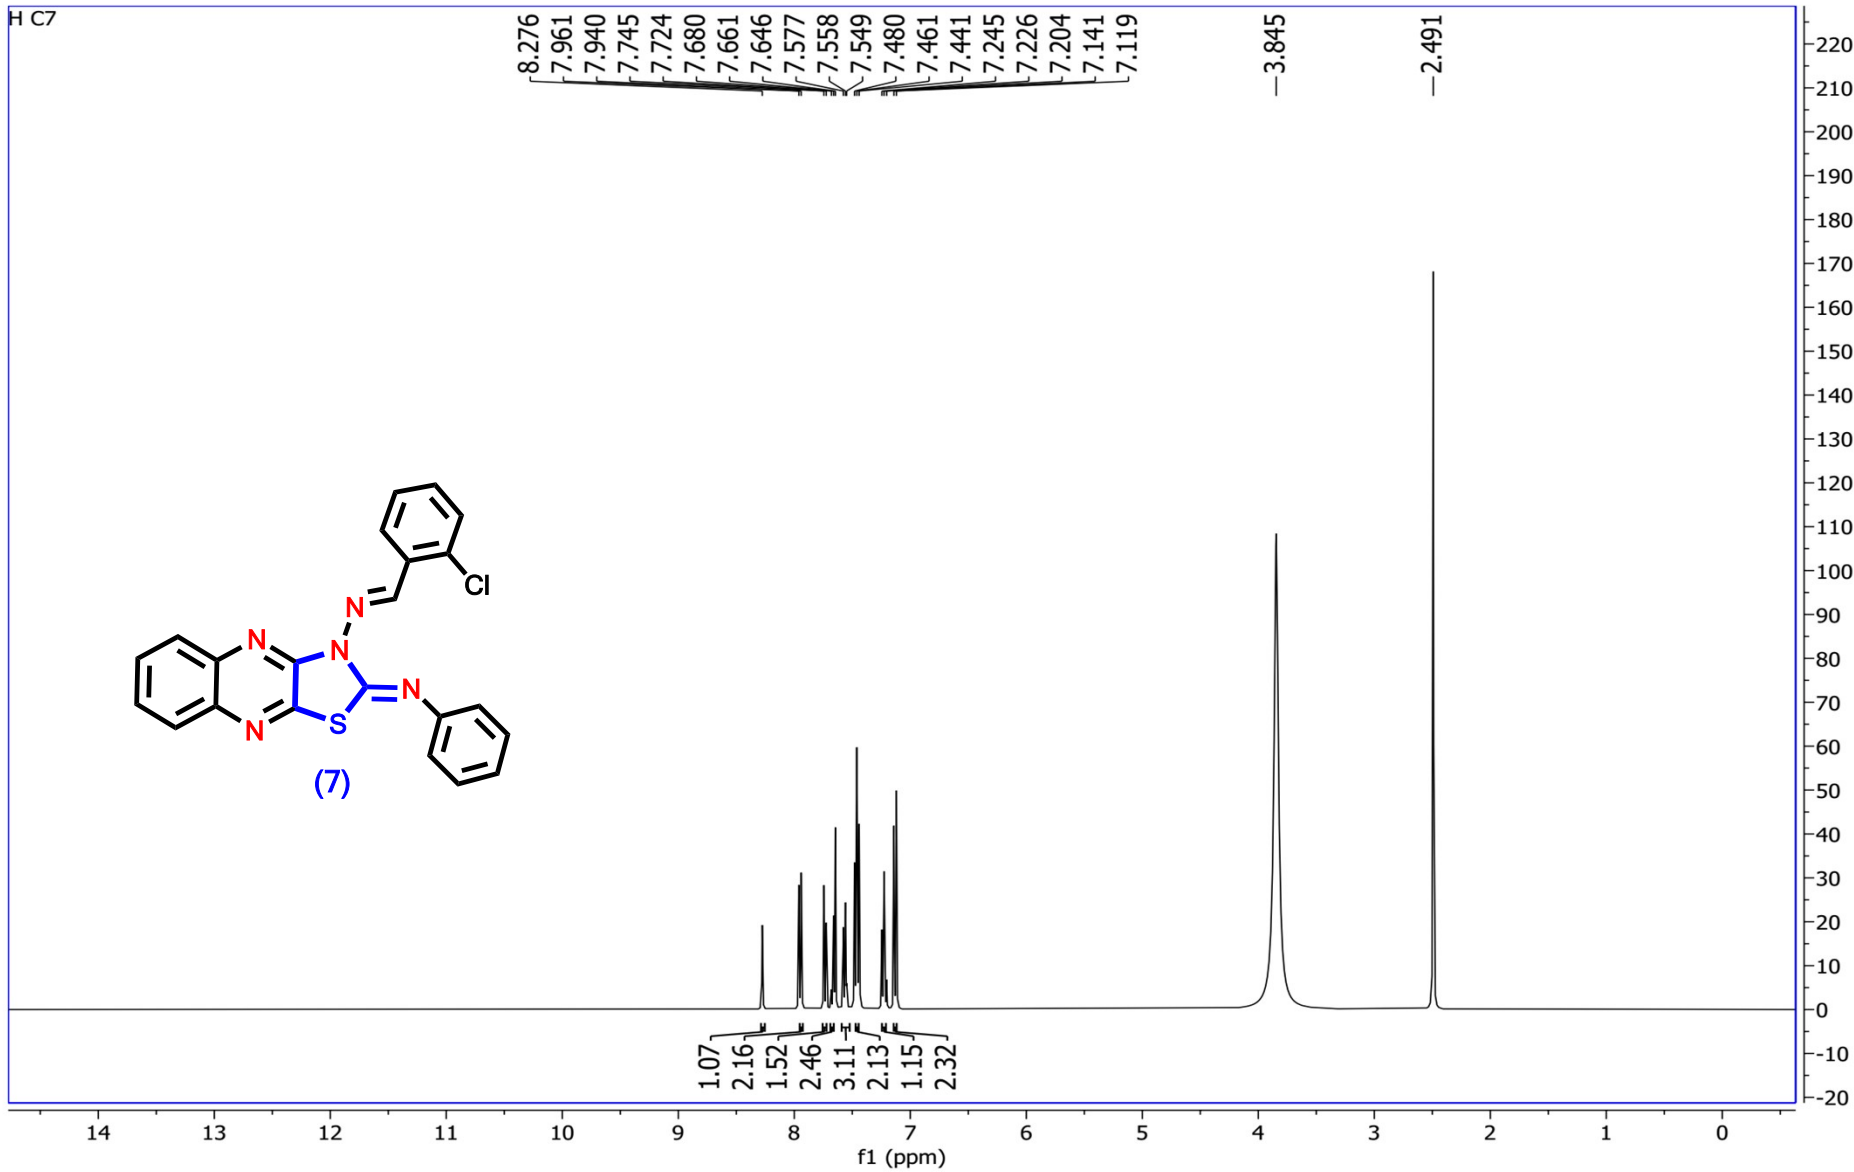

C7

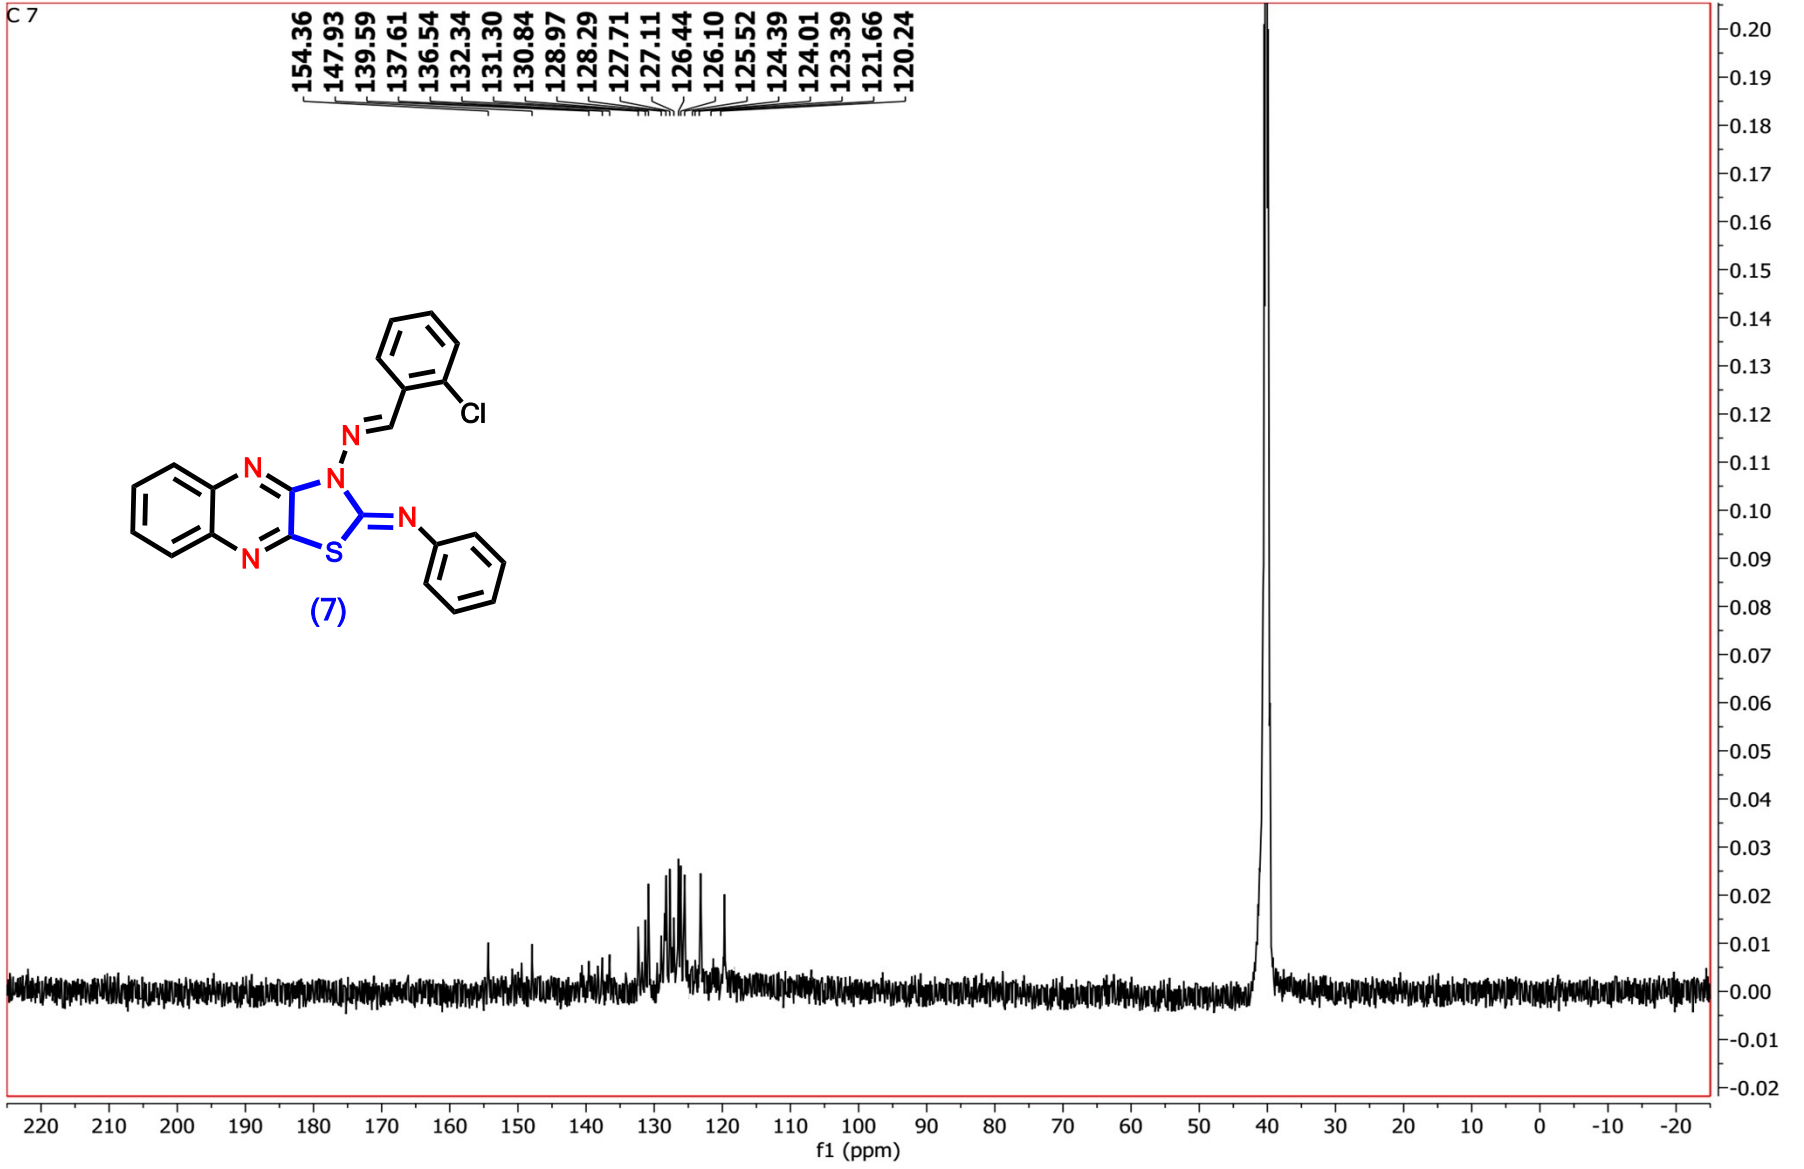

C8 #184 RT: 2.78 P: + NL: 1.42E3  
T: {0,0} + eEI Full ms [40.00-1000.00]

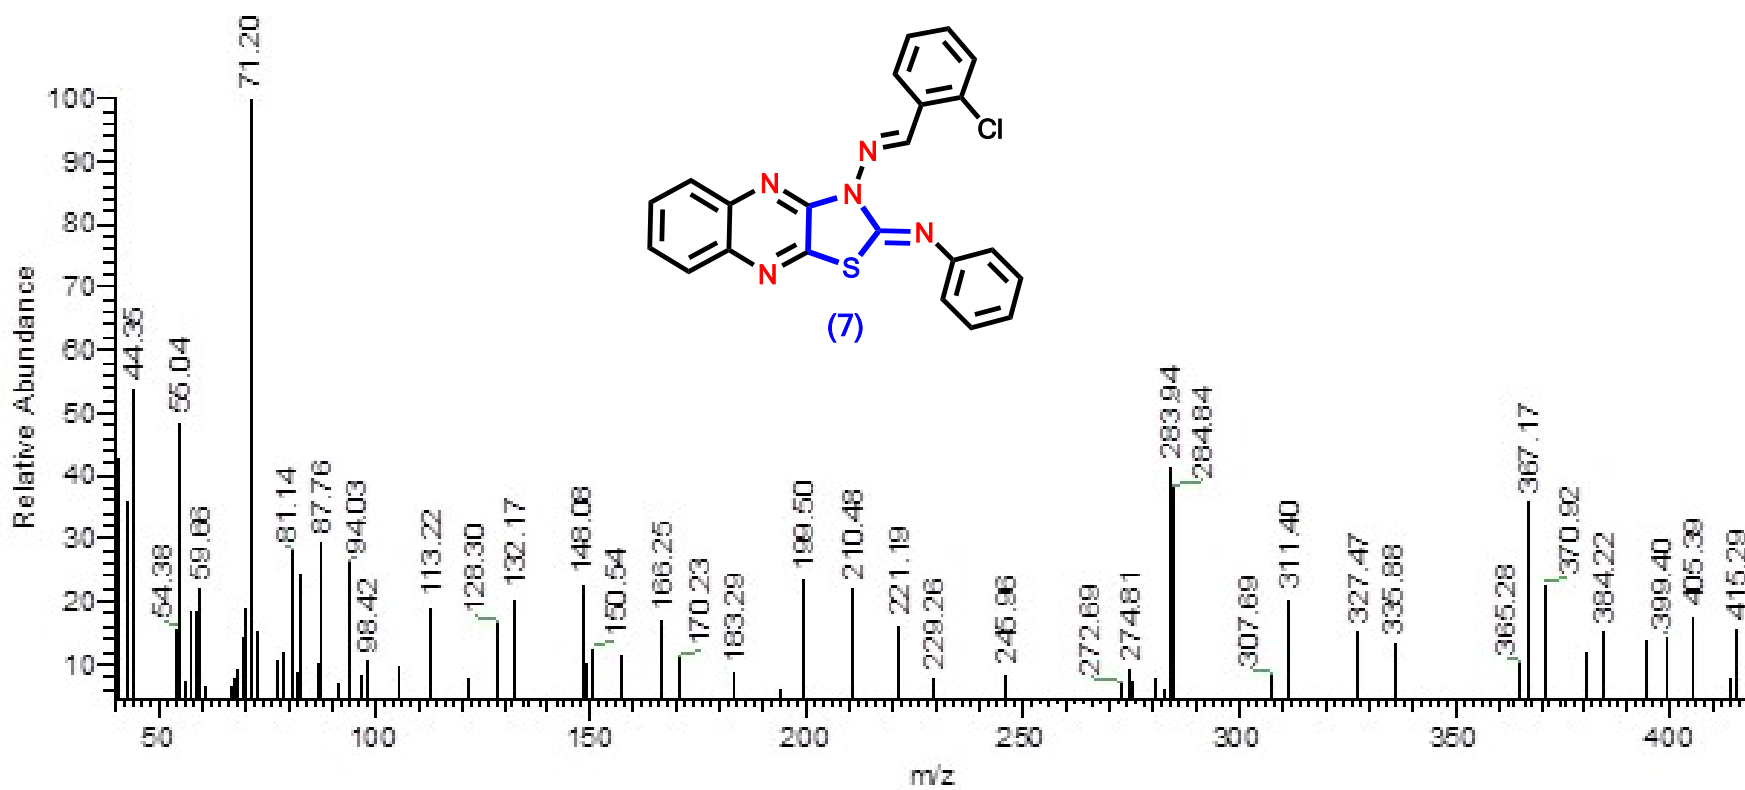

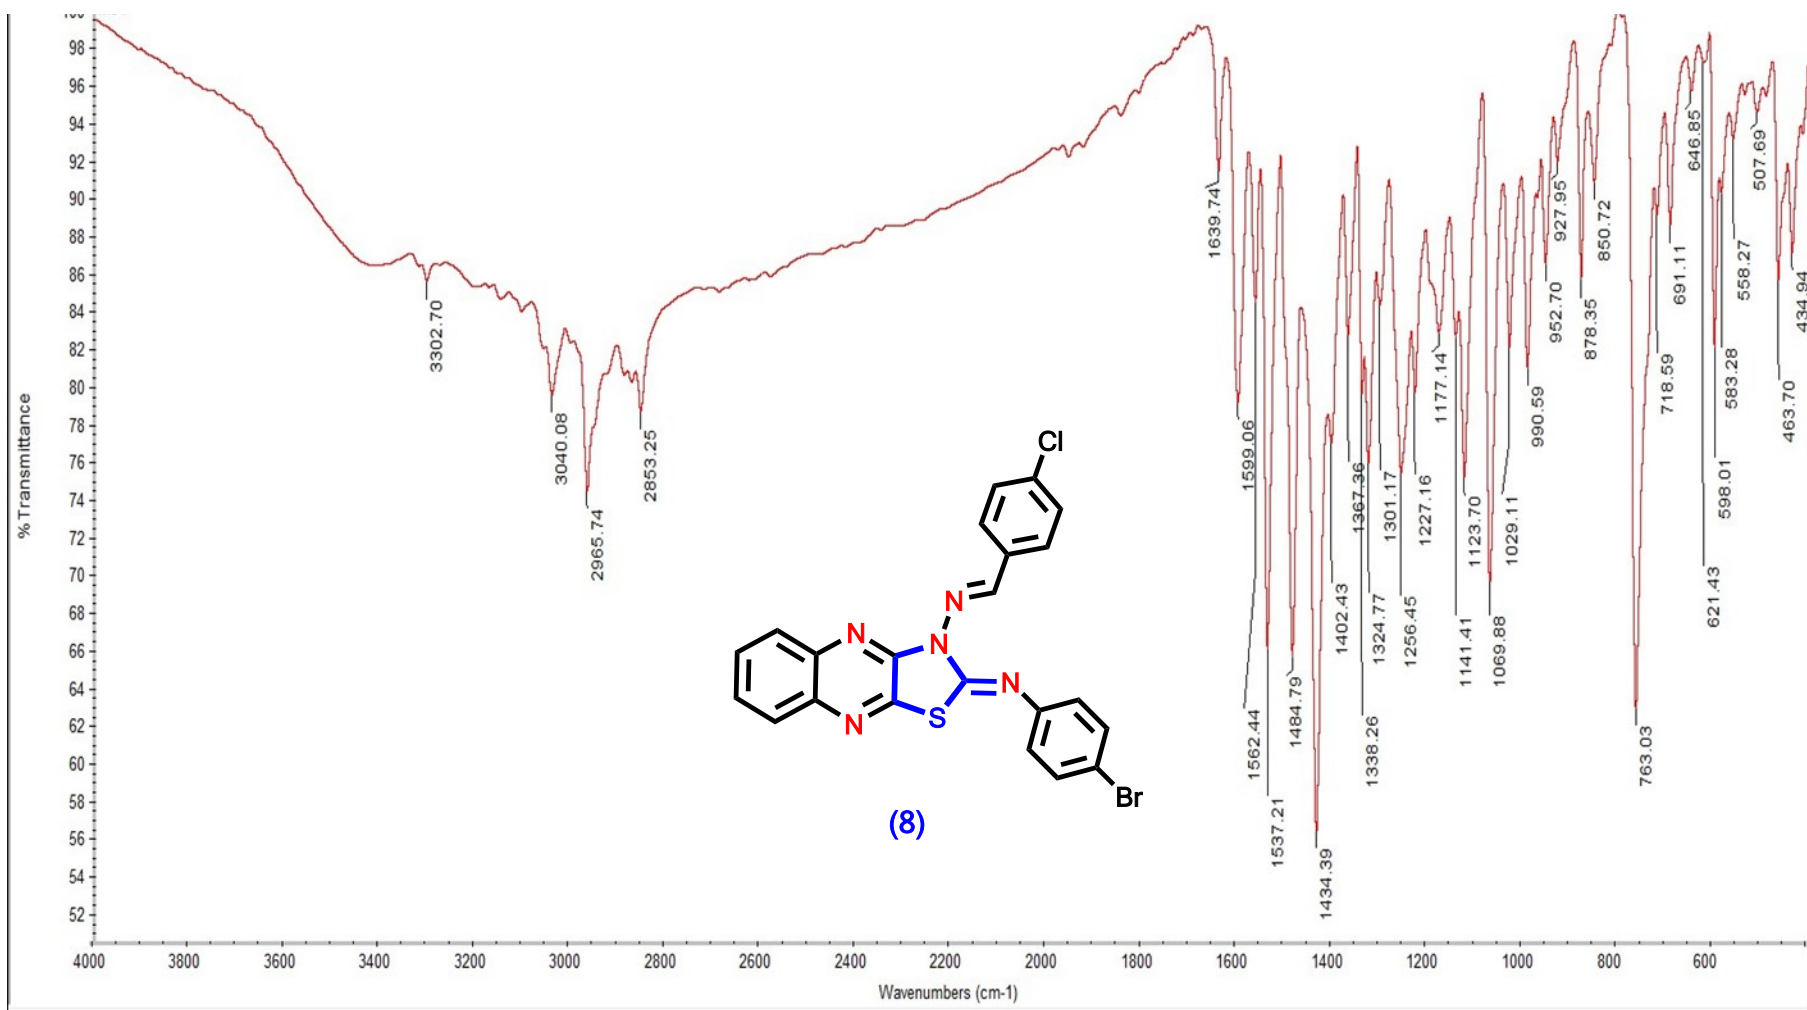

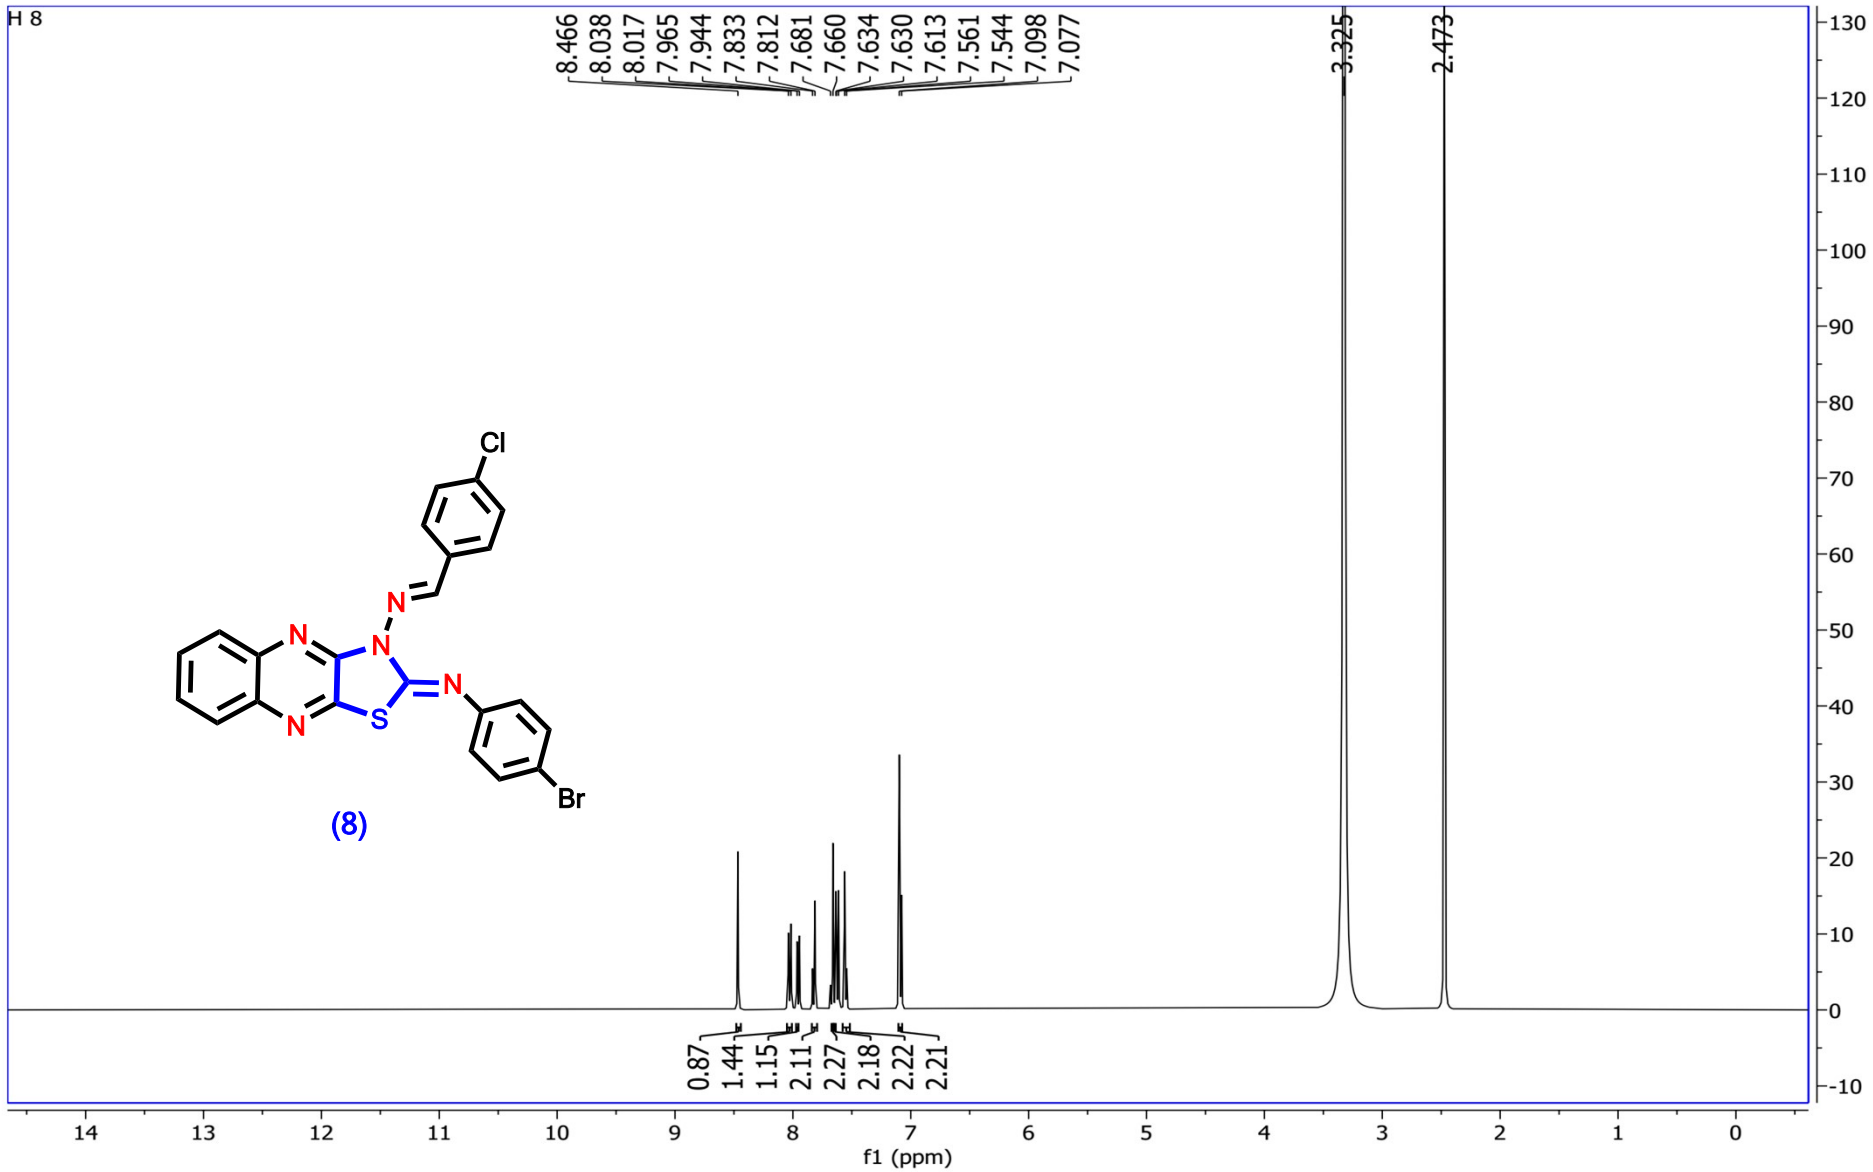



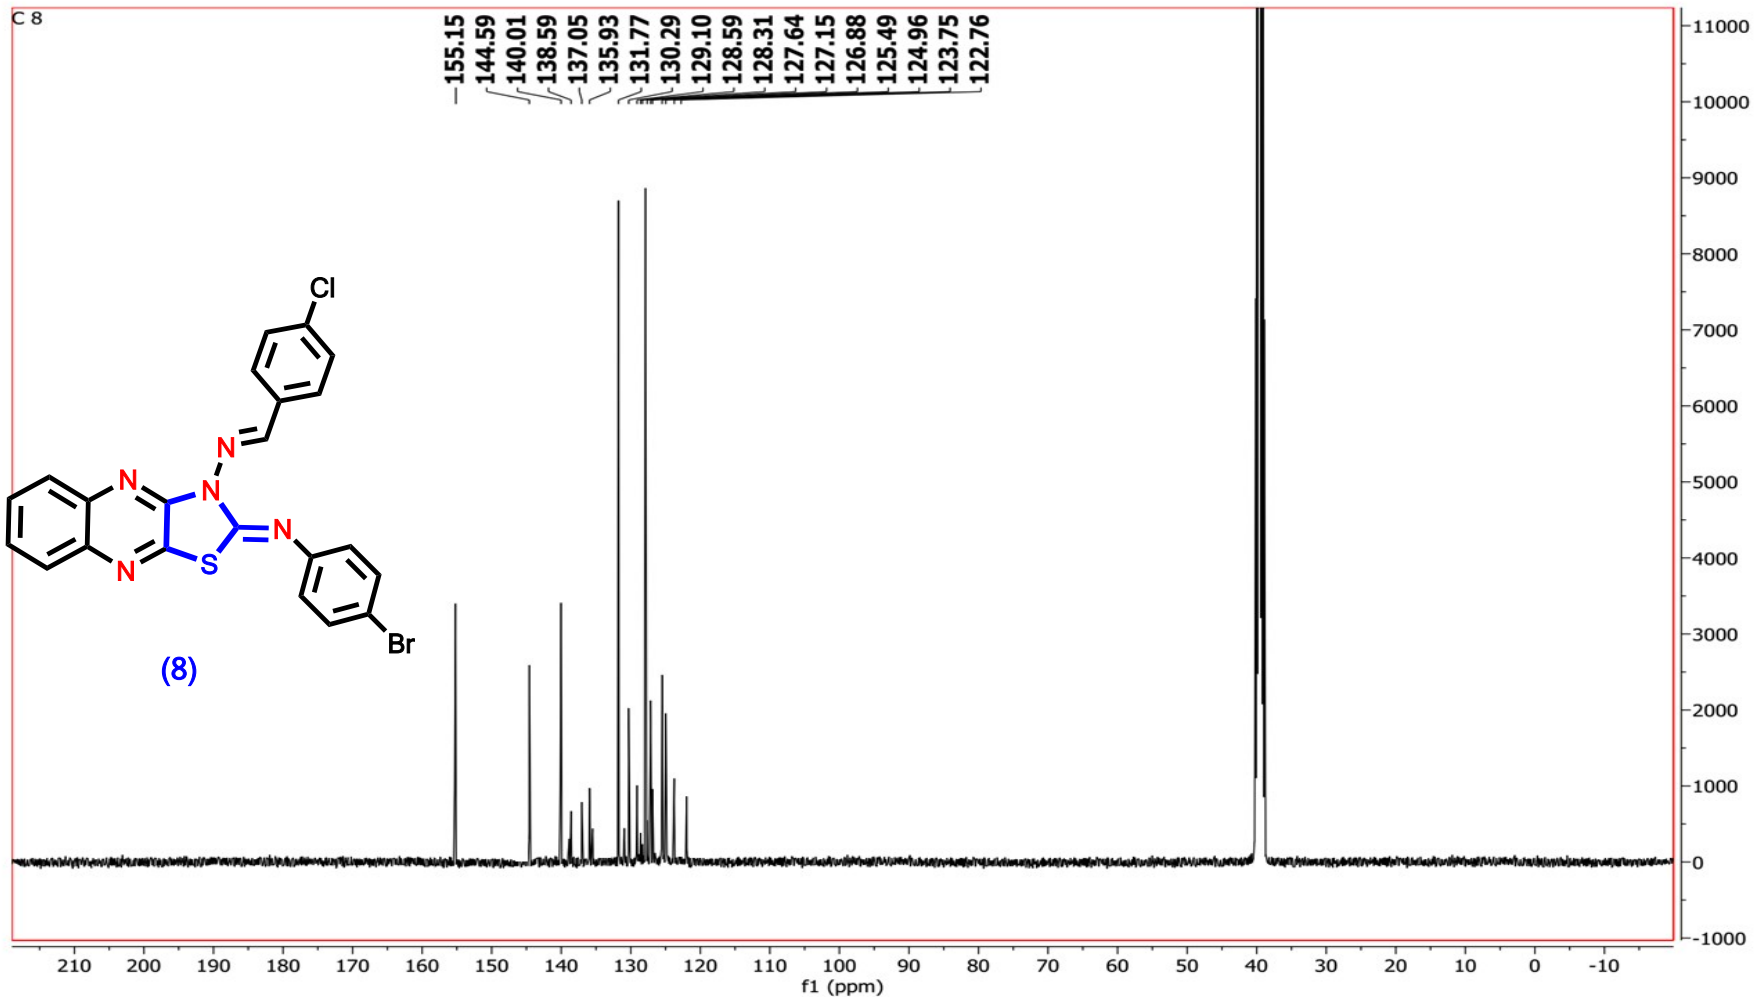

06 #110 RT: 1.86 P: + NL: 5.42E2  
 T: {0,0} + c EI Full ms [40.00-1000.00]

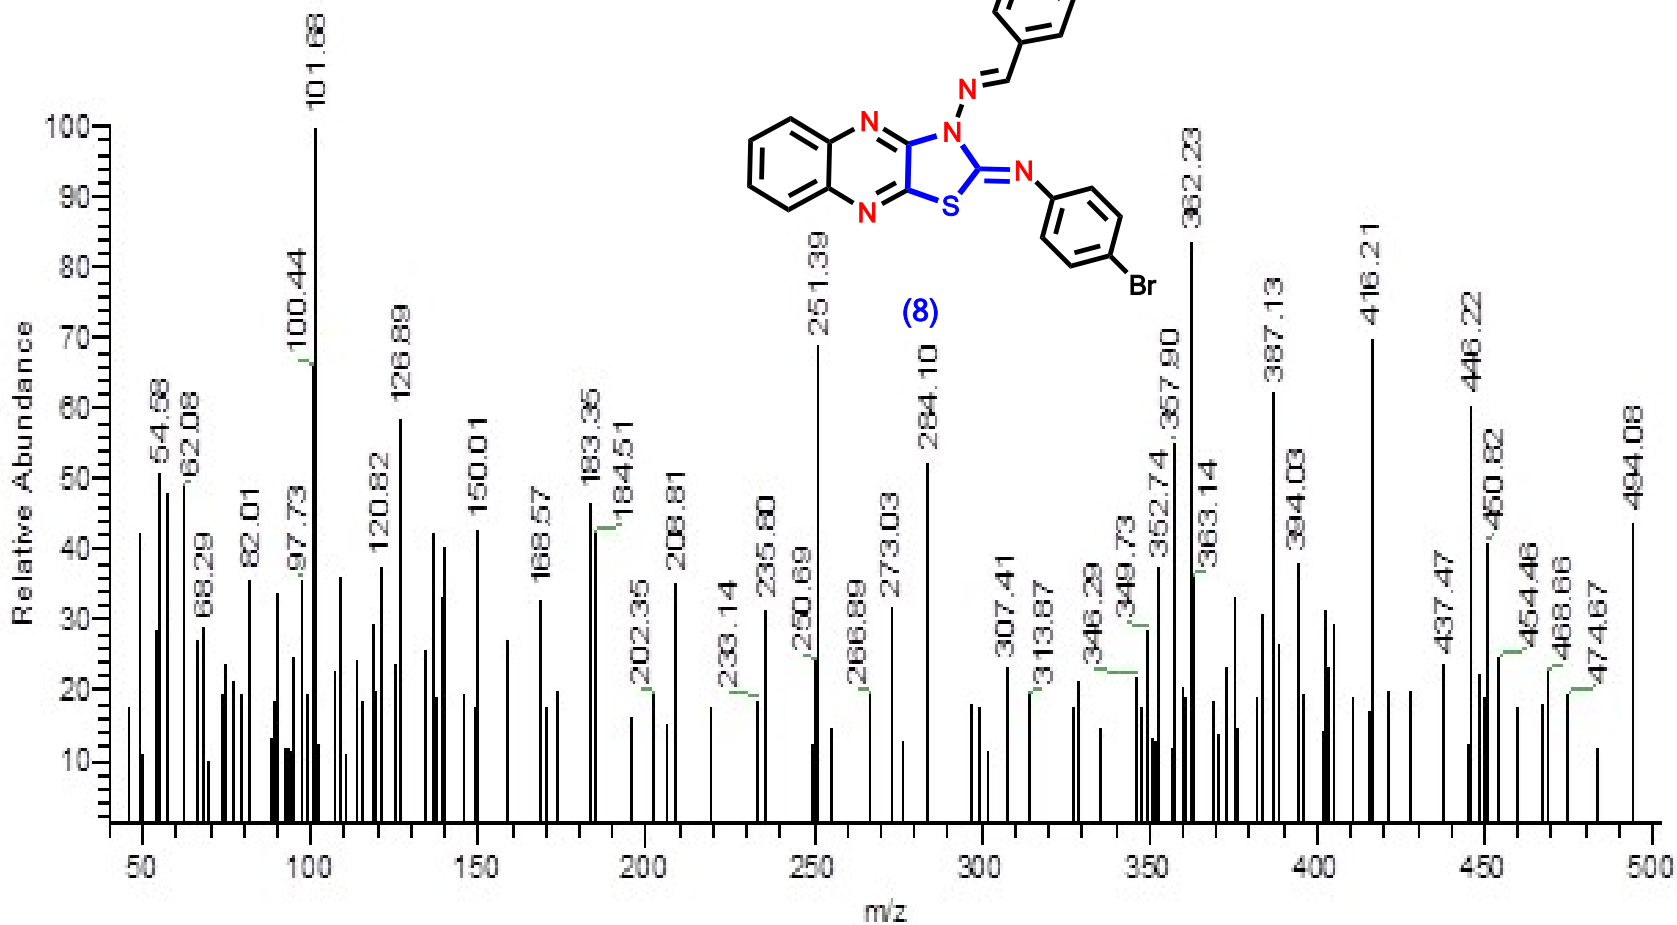

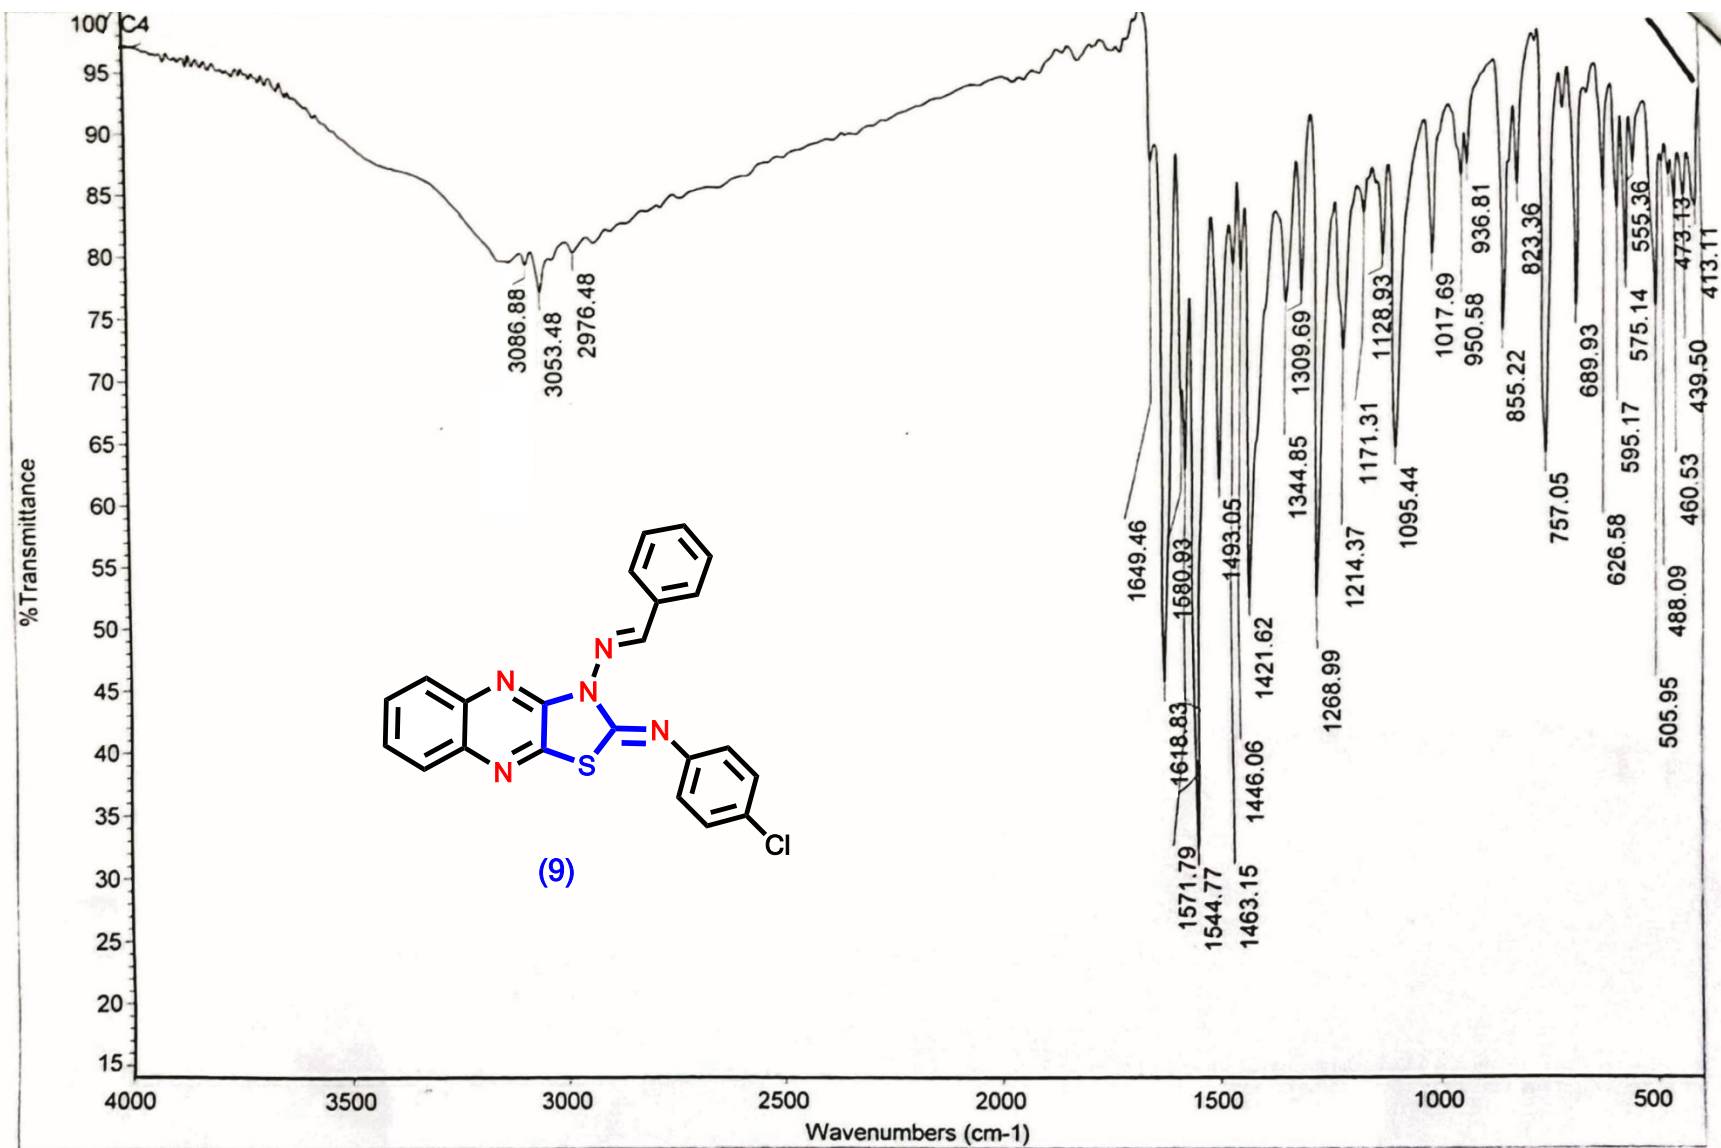

H 9

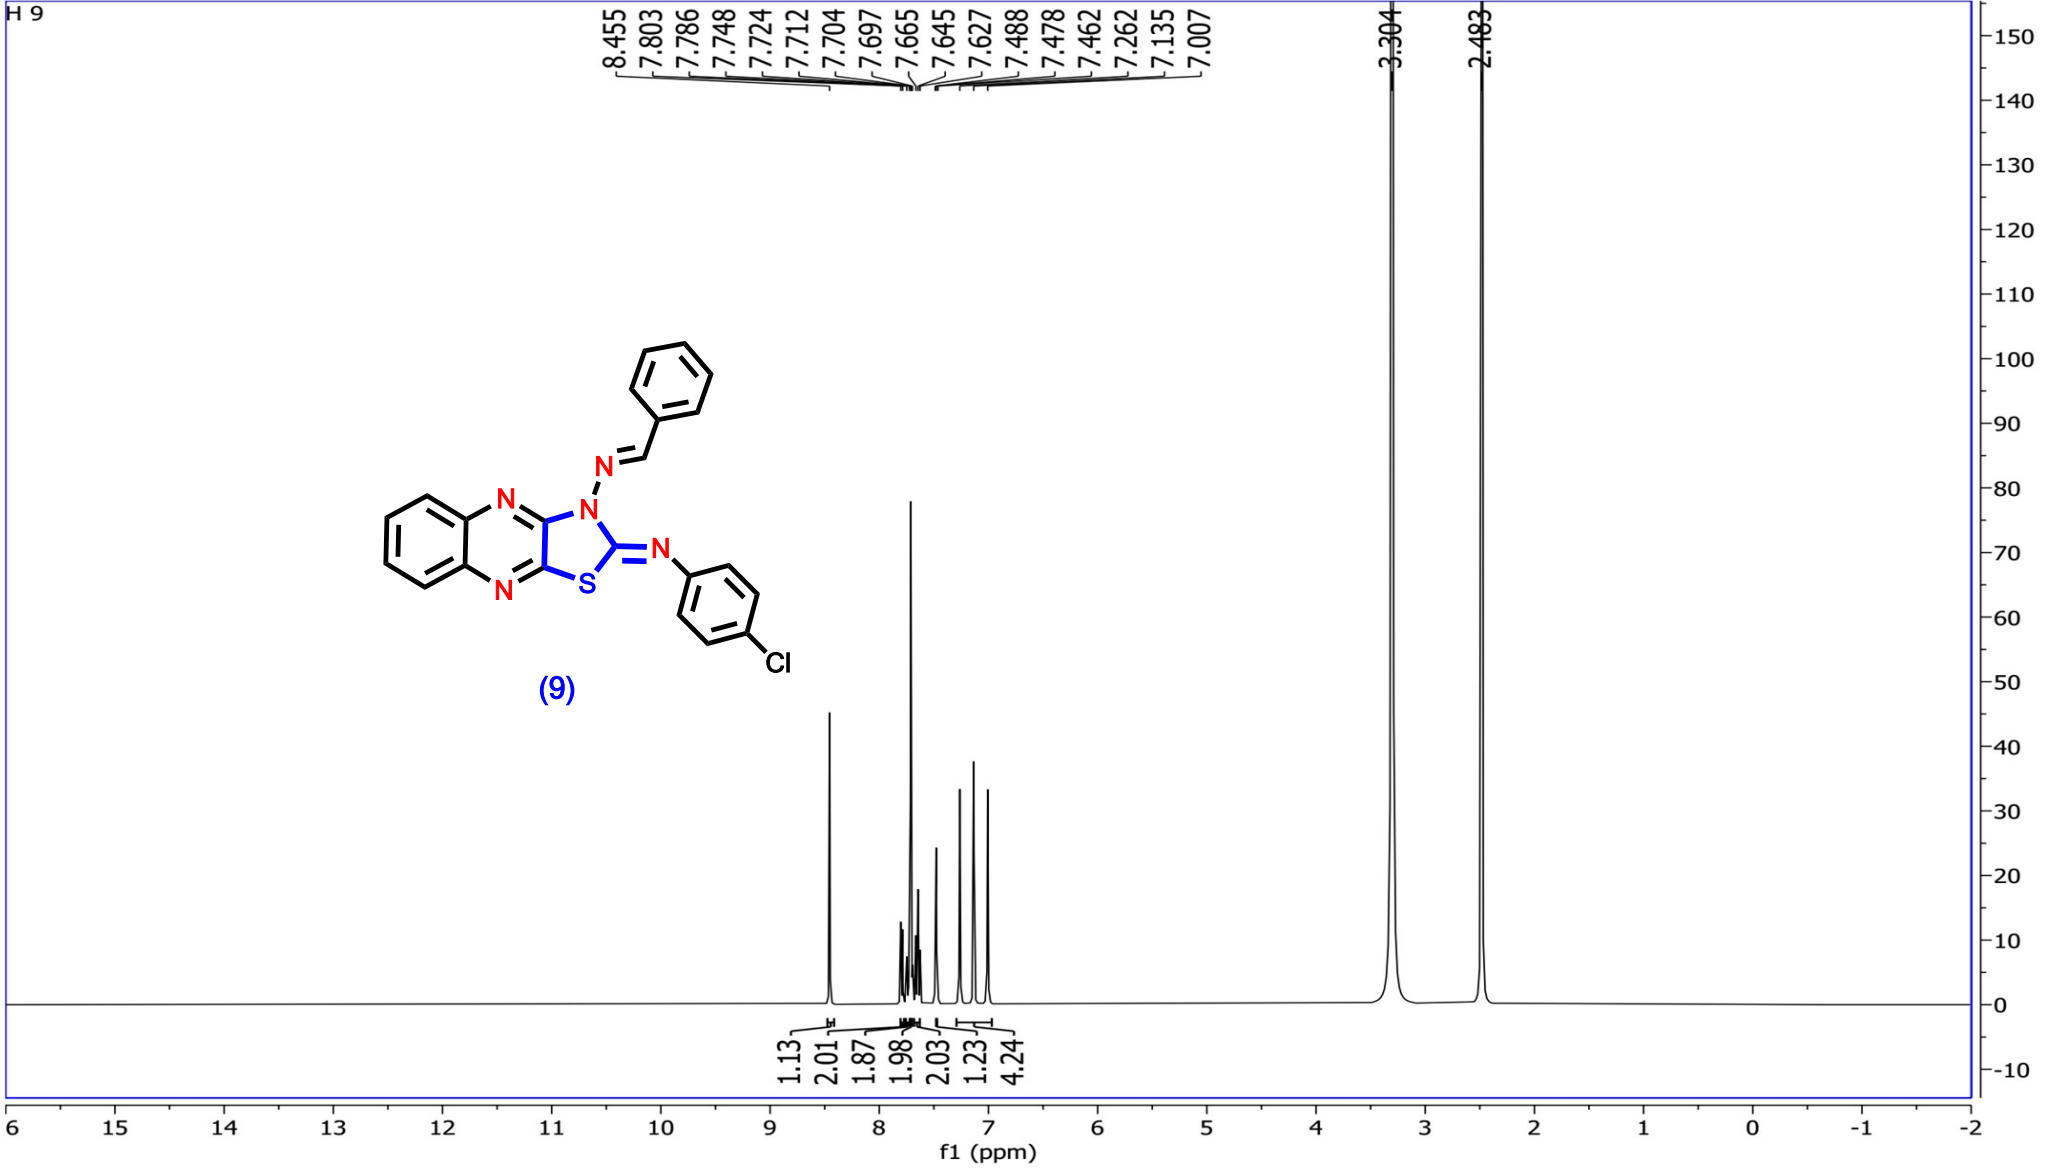

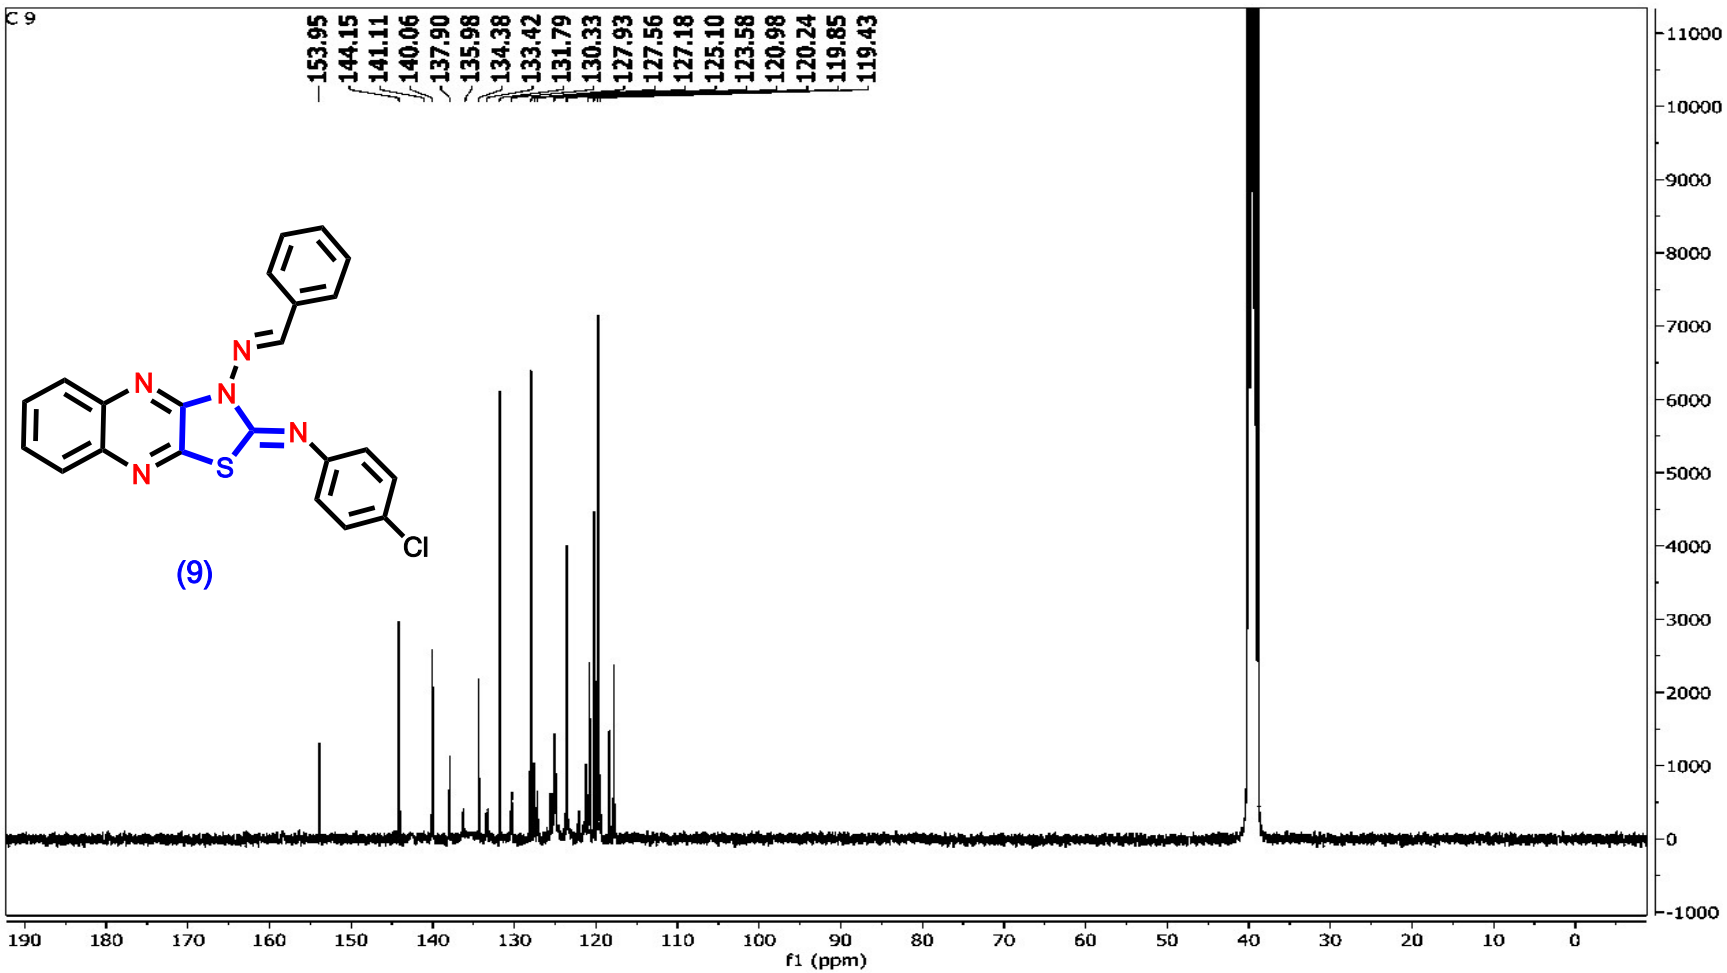

Time (min)

C4 #294 RT: 4.94 P: + NL: 4.02E2  
T: {0,0} + eEI Full ms [40.00-1000.00]

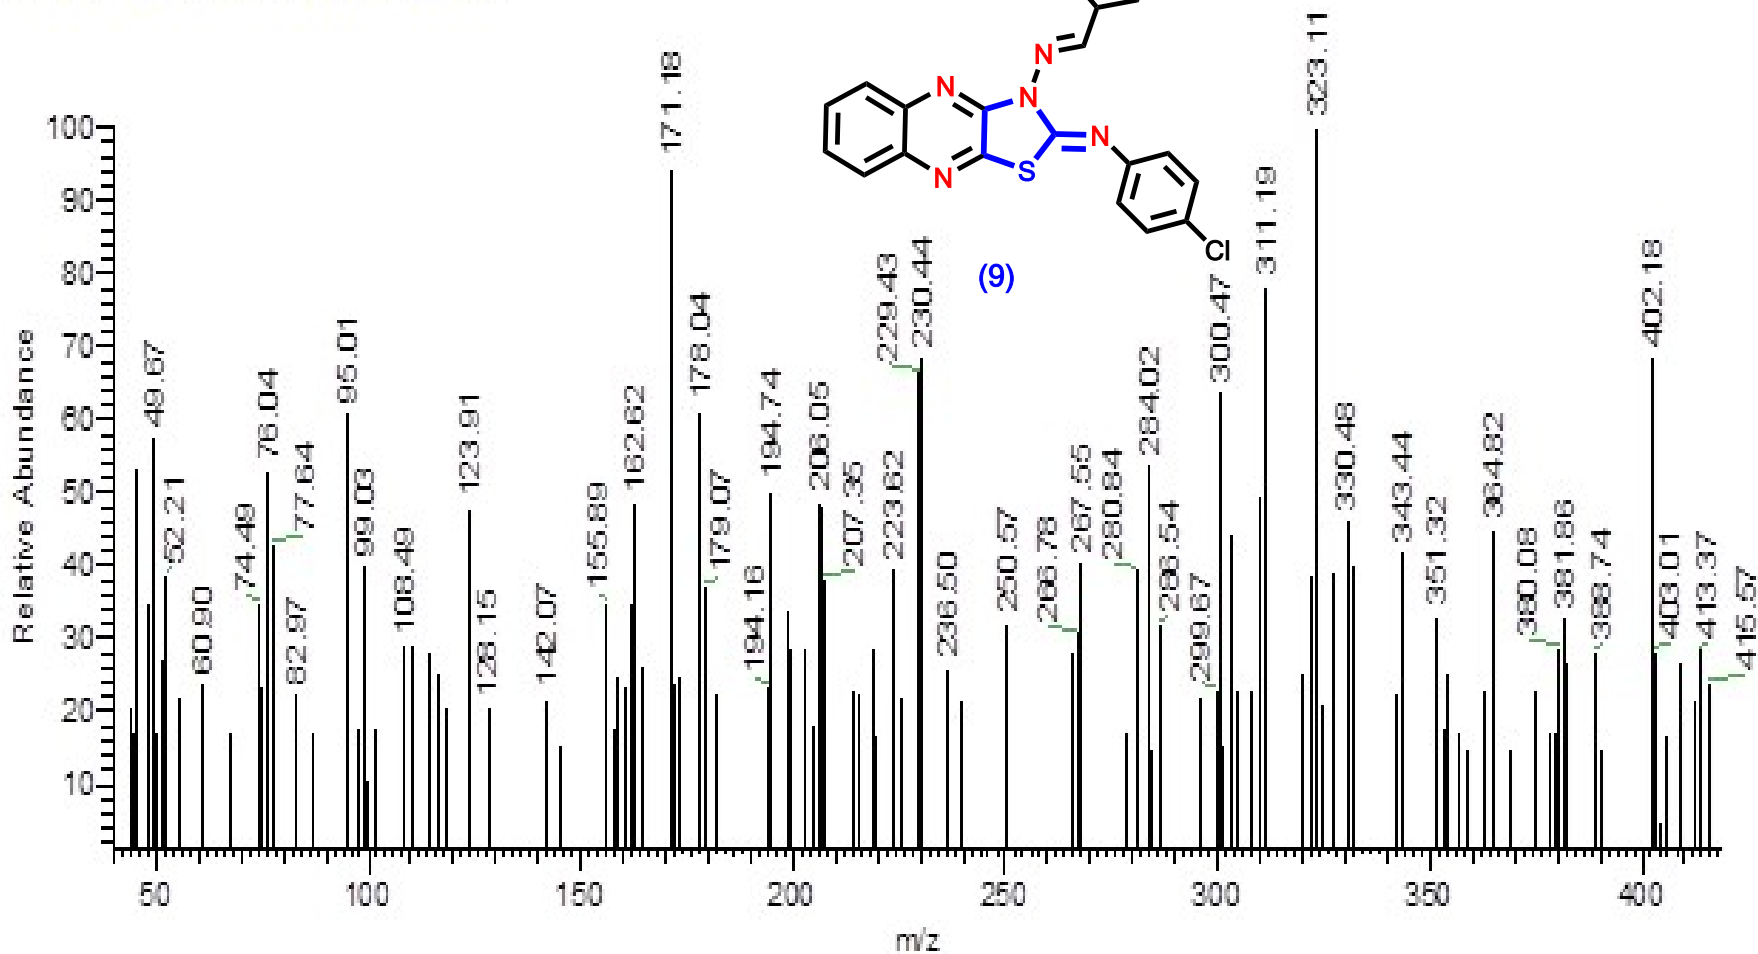

Supplement: d4ra08096c1.pdf [file d4ra08096c1.pdf]
